# Supplementary material for: Protection against malaria at 1 year and immune correlates following PfSPZ vaccination
Source: Springer Nature journal article supplement (doi:10.1038/nm.4110), 2016-05-09
Supplement: 41591_2016_BFnm4110_MOESM66_ESM.pdf [file 41591_2016_BFnm4110_MOESM66_ESM.pdf]

## Supplementary information

### Protection against malaria at 1 year and immune correlates following PfSPZ vaccination

Andrew S Ishizuka<sup>1,13</sup>, Kirsten E Lyke<sup>2,13</sup>, Adam DeZure<sup>1</sup>, Andrea A. Berry<sup>2</sup>, Thomas L Richie<sup>3</sup>, Floreliz H Mendoza<sup>1</sup>, Mary E Enama<sup>1</sup>, Ingelise J Gordon<sup>1</sup>, Lee-Jah Chang<sup>1,12</sup>, Uzma N Sarwar<sup>1,12</sup>, Kathryn L Zephir<sup>1</sup>, LaSonji A Holman<sup>1</sup>, Eric R James<sup>3</sup>, Peter F Billingsley<sup>3</sup>, Anusha Gunasekera<sup>3</sup>, Sumana Chakravarty<sup>3</sup>, Anita Manoj<sup>3</sup>, MingLin Li<sup>3,4</sup>, Adam J Ruben<sup>3</sup>, Tao Li<sup>3</sup>, Abraham G Eappen<sup>3</sup>, Richard E Stafford<sup>3,4</sup>, Natasha KC<sup>3,4</sup>, Tooba Murshedkar<sup>3</sup>, Hope DeCederfelt<sup>5</sup>, Sarah H Plummer<sup>1</sup>, Cynthia S Hendel<sup>1</sup>, Laura Novik<sup>1</sup>, Pamela JM Costner<sup>1</sup>, Jamie G Saunders<sup>1</sup>, Matthew B Laurens<sup>2</sup>, Christopher V Plowe<sup>2</sup>, Barbara Flynn<sup>1</sup>, William R Whalen<sup>1</sup>, JP Todd<sup>1</sup>, Jay Noor<sup>1</sup>, Srinivas Rao<sup>1,12</sup>, Kailan Sierra-Davidson<sup>1</sup>, Geoffrey M Lynn<sup>1</sup>, Judith E Epstein<sup>6</sup>, Margaret A. Kemp<sup>7</sup>, Gary A Fahle<sup>7</sup>, Sebastian A Mikolajczak<sup>8</sup>, Matthew Fishbaugher<sup>8</sup>, Brandon K Sack<sup>8</sup>, Stefan HI Kappe<sup>8</sup>, Silas A Davidson<sup>9</sup>, Lindsey S Garver<sup>9</sup>, Niklas K Björkström<sup>10</sup>, Martha C Nason<sup>11</sup>, Barney S Graham<sup>1</sup>, Mario Roederer<sup>1</sup>, B Kim Lee Sim<sup>3,4</sup>, Stephen L Hoffman<sup>3,14</sup>, Julie E Ledgerwood<sup>1,14</sup> & Robert A Seder<sup>1,14</sup>, for the VRC 312 and VRC 314 Study Teams<sup>13</sup>

<sup>1</sup>Vaccine Research Center, National Institute of Allergy and Infectious Diseases (NIAID), National Institutes of Health (NIH), Bethesda, Maryland, USA.

<sup>2</sup>Institute for Global Health, Center for Vaccine Development and Division of Malaria Research, University of Maryland School of Medicine, Baltimore, Maryland, USA.

<sup>3</sup>Sanaria Inc., Rockville, Maryland, USA.

<sup>4</sup>Protein Potential, LLC, Rockville, Maryland, USA.

<sup>5</sup>Pharmaceutical Development Section, Clinical Center, National Institutes of Health, Bethesda, Maryland, USA.

<sup>6</sup>Naval Medical Research Center, Malaria Department, Silver Spring, Maryland, USA.

<sup>7</sup>Department of Laboratory Medicine, Clinical Center, National Institutes of Health, Bethesda, Maryland, USA.

<sup>8</sup>Center for Infectious Disease Research, Seattle, Washington, USA.

<sup>9</sup>Entomology Branch, Walter Reed Army Institute of Research, Silver Spring, Maryland, USA.

<sup>10</sup>Center for Infectious Medicine, Department of Medicine Huddinge, Karolinska Institutet, Karolinska University Hospital, Stockholm, Sweden.

<sup>11</sup>Biostatistics Research Branch, Division of Clinical Research, National Institute of Allergy and Infectious Diseases, National Institutes of Health, Bethesda, Maryland, USA.

<sup>12</sup>Present addresses: Sanofi, Swiftwater, Pennsylvania, USA (L-J.C.); Albert Einstein College of Medicine, Montefiore Medical Center, New York, New York, USA (U.N.S.); Sanofi, Cambridge, Massachusetts, USA (S.R.).

<sup>13</sup>These authors contributed equally to this work.

<sup>14</sup>These authors jointly directed this work.

Correspondence should be addressed to R.A.S. (rseder@mail.nih.gov).

## Supplementary Text

### Supplementary Figures 1–11

### Supplementary Tables 1–7

## Supplementary Text

Members of the VRC 312 Study Team have been previously reported<sup>11</sup>.

The members of the VRC 314 Study Team are as follows:

EMMES Corporation, Rockville, Maryland, USA: L. Diep, M. Kunchai, H. Loblein, P. Renehan. Entomology Branch, Walter Reed Army Institute of Research, Silver Spring, Maryland, USA: C. Brando, M. Dowler, K. Kobylinski, D. Patel, T. Savransky, and K. Walker. Institute for Global Health, Center for Vaccine Development and Division of Malaria Research, University of Maryland School of Medicine, Baltimore, Maryland, USA: M. Adams, M. Billington, L. Chrisley, J. Courneya, T. Crawford, B. Dorsey, N. Johnson, N. Greenberg, D. Ingram, S. Joshi, P. Komninou, A. Kwon, K. Wilhelmi, T. Robinson, B. Sreshtha, K. Strauss, M. Travassos, and X. Wang. U.S. National Institutes of Health (NIH) Clinical Center (CC) Pharmacy, Bethesda, Maryland, USA: J. Starling. NIH CC Department of Laboratory Medicine, Bethesda, Maryland, USA: S. Antonara, J. Brocious, A. Lau, E. Williams. Sanaria Inc., Rockville, Maryland, USA, and Protein Potential LLC, Rockville, Maryland, USA: Y. Abebe, A. Awe, F. Beams, E. Fomumbod, L. Gao, A. Hoffman, H. Huang, J. Jackson, M. Laskowski, B. Jiang, M. King, S. Matheny, K. Nelson, M. Orozco, J. Overby, D. Padilla, A. Patil, V. Pich, E. Saverino, R. Thompson, T.T. Wai, Y. Wen, and R. Xu. Vaccine Research Center, National Institutes of Allergy and Infectious Diseases, NIH, Bethesda, Maryland, USA: R. Bailer, N. Berkowitz, J. Casazza, E. Coates, B. Larkin, I. Pittman, S. Sitar, O. Vasilenko, P. Williams, B. Wilson, and G. Yamshchikov.

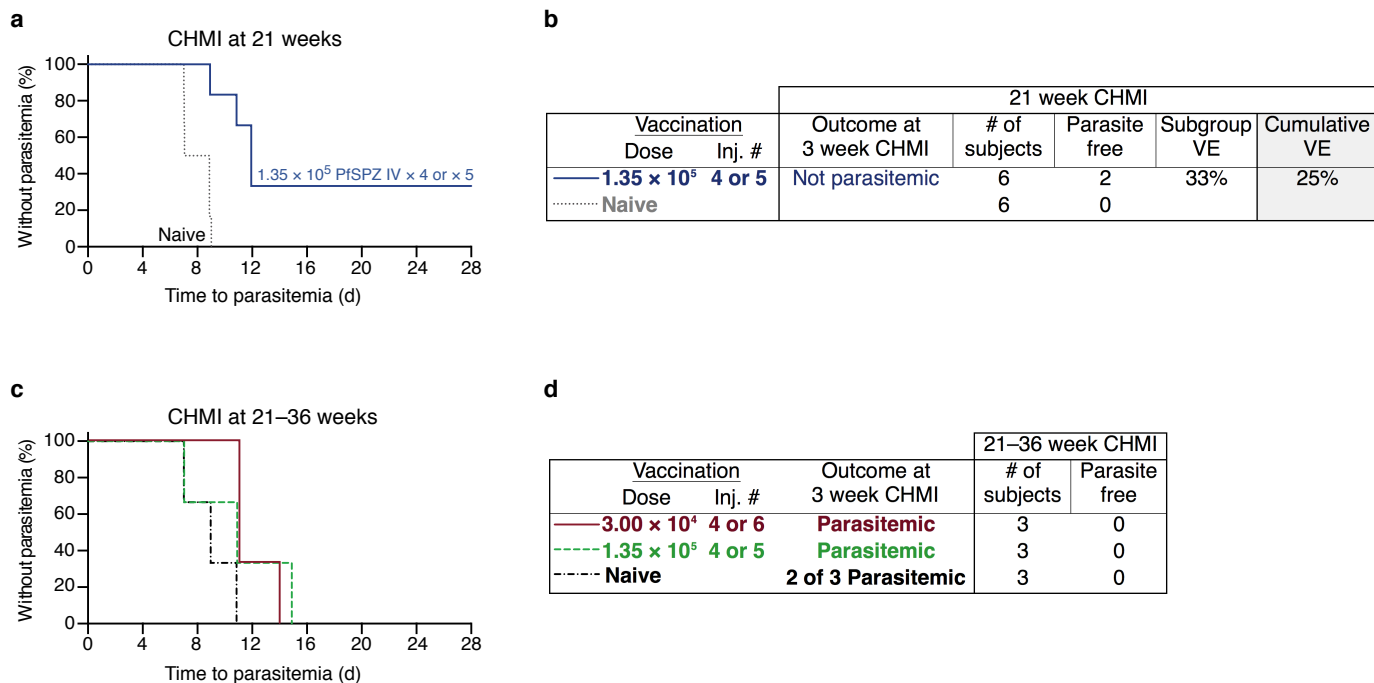

**Supplementary Figure 1** Preliminary assessment of PfSPZ Vaccine efficacy at 21–36 weeks after vaccination (VRC 312).

Following demonstration of vaccine efficacy 3 weeks after 4 or 5 intravenous immunizations with  $1.35 \times 10^5$  PfSPZ in the VRC 312 study, subjects were re-enrolled to undergo repeat CHMI 21–36 weeks after final immunization.

**(a)** Kaplan-Meier curve for six subjects who received  $1.35 \times 10^5$  PfSPZ administered intravenously (IV) 4 or 5 times ( $n = 3$  per group) and who were not parasitemic at CHMI 3 weeks after final immunization (October 2012) underwent repeat CHMI 21 weeks after final immunization (February 2013). Kaplan-Meier curve shows the percent of individuals who did not develop parasitemia after CHMI.

**(b)** Vaccine efficacy. Of the 6 vaccine recipients who were previously not parasitemic at 3 week CHMI, 4/6 developed parasitemia after CHMI 21 weeks after vaccination. Subgroup VE was 33% ( $P = 0.23$ , one-sided Fisher's exact test) and cumulative VE for the entire  $1.35 \times 10^5$  PfSPZ dose group was 25%.

**(c)** Kaplan-Meier curve for additional subjects that underwent CHMI 21–36 weeks after final immunization (February 2013). Vaccine recipients who were parasitemic at 3 week CHMI in July 2012 and October 2012 ( $n = 3$  from  $3.0 \times 10^4$  PfSPZ/dose group and  $n = 3$  from  $1.35 \times 10^5$  PfSPZ/dose group) and unvaccinated controls ( $n = 3$ ) from October 2012 CHMI also underwent repeat CHMI in February 2013. All developed parasitemia. One additional subject from the  $3.0 \times 10^4$  PfSPZ/dose group had an incomplete CHMI and is excluded from further analysis.

**(d)** Summary of outcomes for additional subjects from February 2013 CHMI.

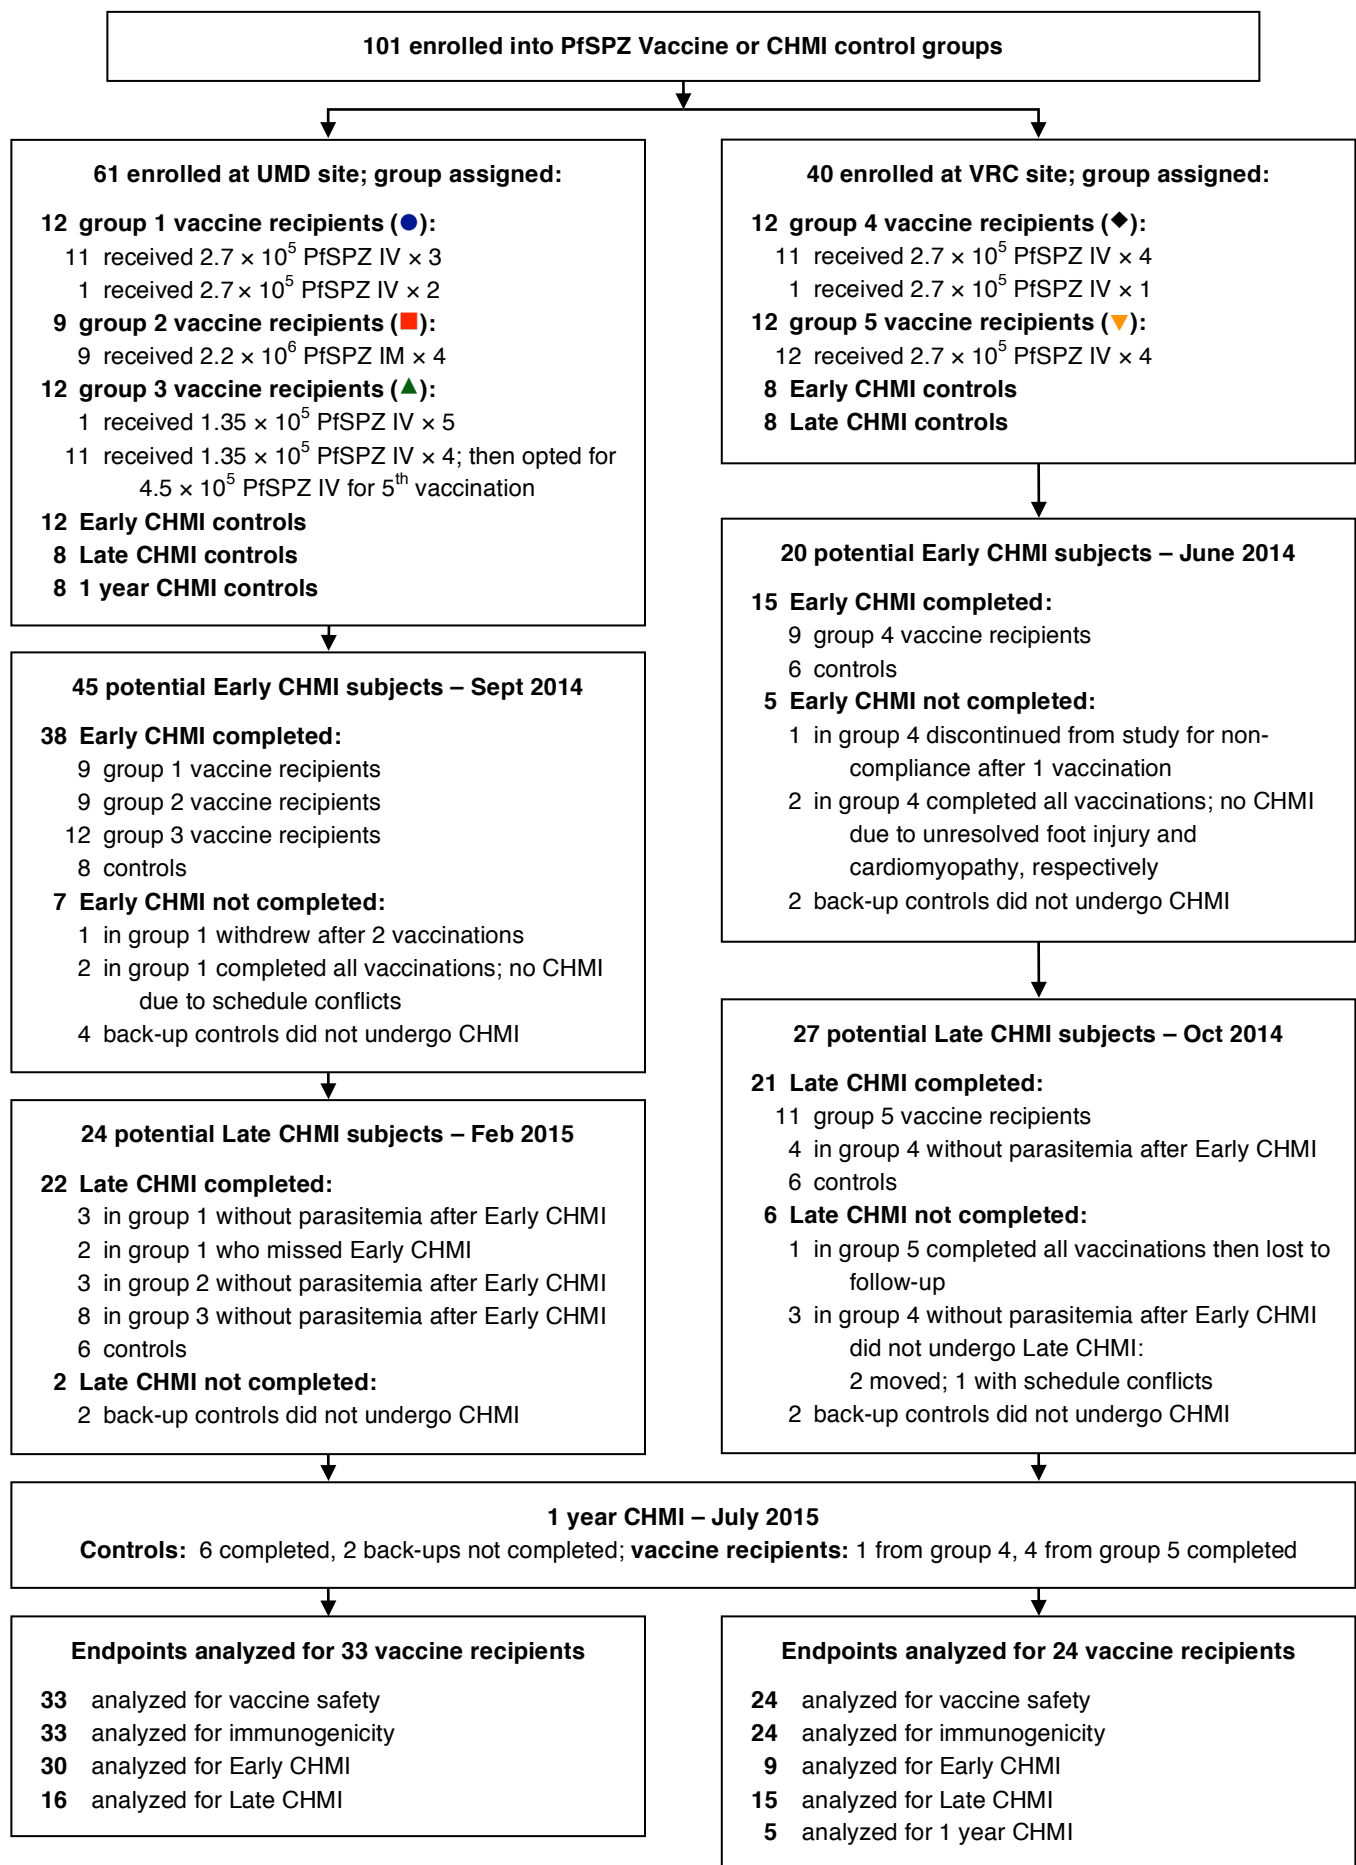

**Supplementary Figure 2** Enrollment, vaccinations, CHMIs, and study endpoints (VRC 314). “Early CHMI” occurred 3 weeks after final vaccination, “Late CHMI” occurred 21–25 weeks after final vaccination, and “1 year CHMI” occurred 59 weeks after final vaccination.

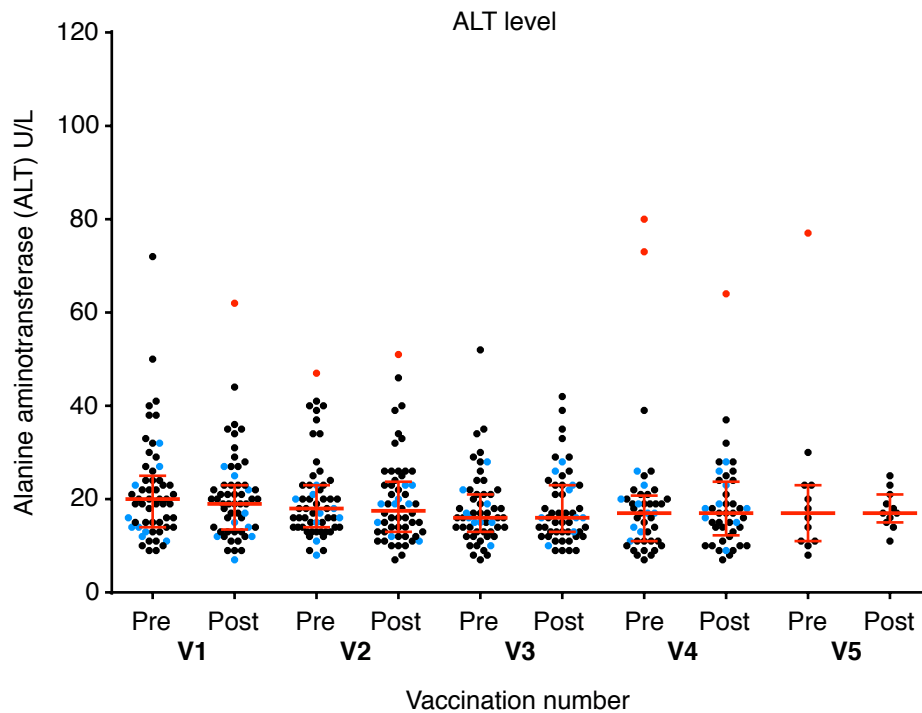

**Supplementary Figure 3** Liver enzyme (ALT) levels pre- and post-vaccination. Alanine aminotransferase (ALT) levels were measured immediately before (Pre) and 14 days after (Post) each vaccination (V1 through V5) for all vaccine groups. There was no difference ( $P > 0.05$ ) between pre- and post-vaccination ALT levels after any vaccination (comparisons between pre- and post- values for each vaccination by Wilcoxon signed rank test with Bonferroni correction for multiple comparisons). A grade 1 ALT of 60 U/L was measured in one vaccine recipient 28 days after vaccination #3. Red bars, median  $\pm$  interquartile range; black dots, IV administration; blue dots, IM administration; red dots, grade 1 adverse events (1.1–2.5x the upper limit of normal). Normal ALT range: 0–41 U/L males, 0–33 U/L female (VRC site); 21–72 U/L males, 9–52 U/L females (UMD site).

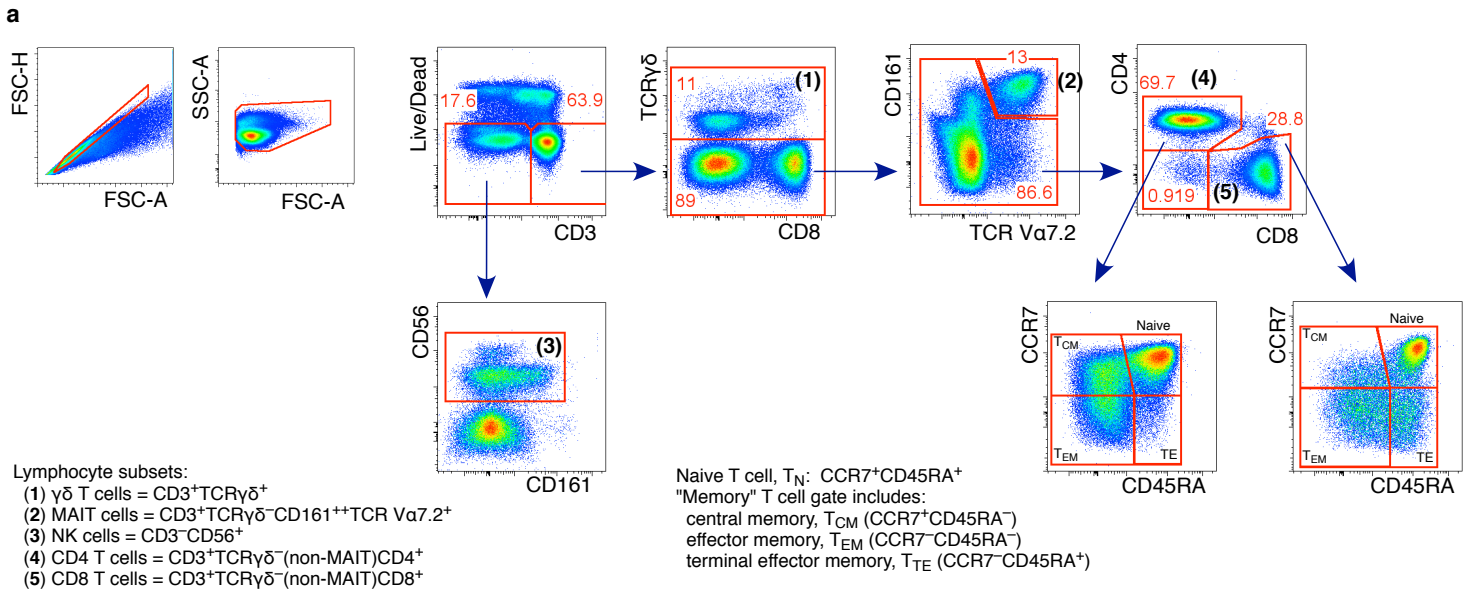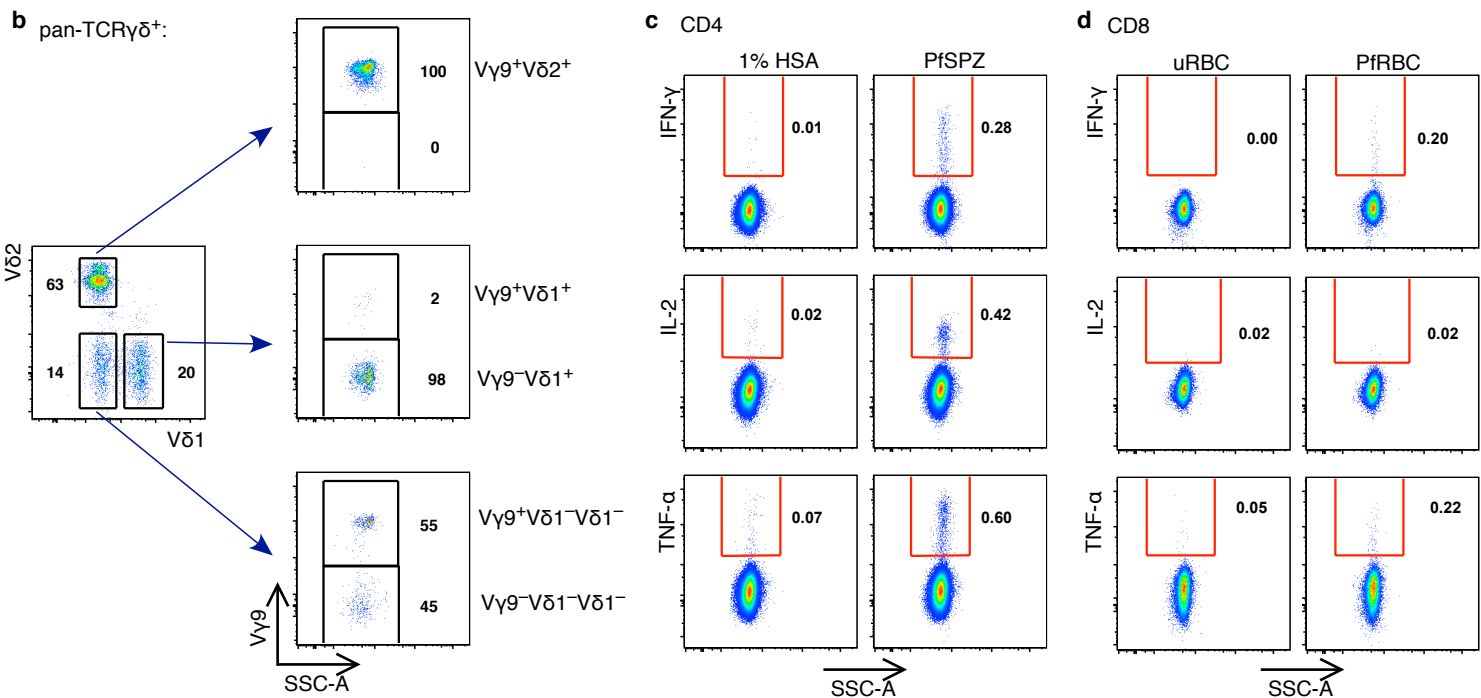

**Supplementary Figure 4** Flow cytometry gating tree for analysis of human PBMCs.

Three flow cytometry staining panels were developed to assess the magnitude, quality, and phenotype of Pf-specific lymphocytes. The rationale for the cellular subsets and the phenotypic markers are described in **Supplementary Table 6**.

(a) Gating tree for staining Panels 1, 2, and 3 (**Supplementary Table 6**), with the following exceptions:

Panel 2, CD4 vs. CD8 T cell gate directly follows  $TCR\gamma\delta^-$  gate.

Panel 3,  $TCR\gamma\delta^+$  cells are subdivided into  $V\delta2^+$  vs.  $V\delta1^+$  vs.  $V\delta2^-V\delta1^-$  cells, and then further subdivided into  $V\gamma9^+$  vs.  $V\gamma9^-$  subsets (b).

(c) PBMCs were stimulated with PfSPZ or vaccine diluent (1% HSA) and assessed for intracellular cytokine expression by flow cytometry. PfSPZ-specific CD4 T cells are identified by expression of any combination of IFN- $\gamma$ , IL-2, or TNF- $\alpha$ .

(d) PBMCs were stimulated with Pf-infected erythrocyte lysate (PfRBC) or uninfected control lymphocytes (uRBC) and assessed for intracellular cytokine expression by flow cytometry. PfRBC-specific CD8 T cells are identified by expression of any combination of IFN- $\gamma$ , IL-2, or TNF- $\alpha$ .

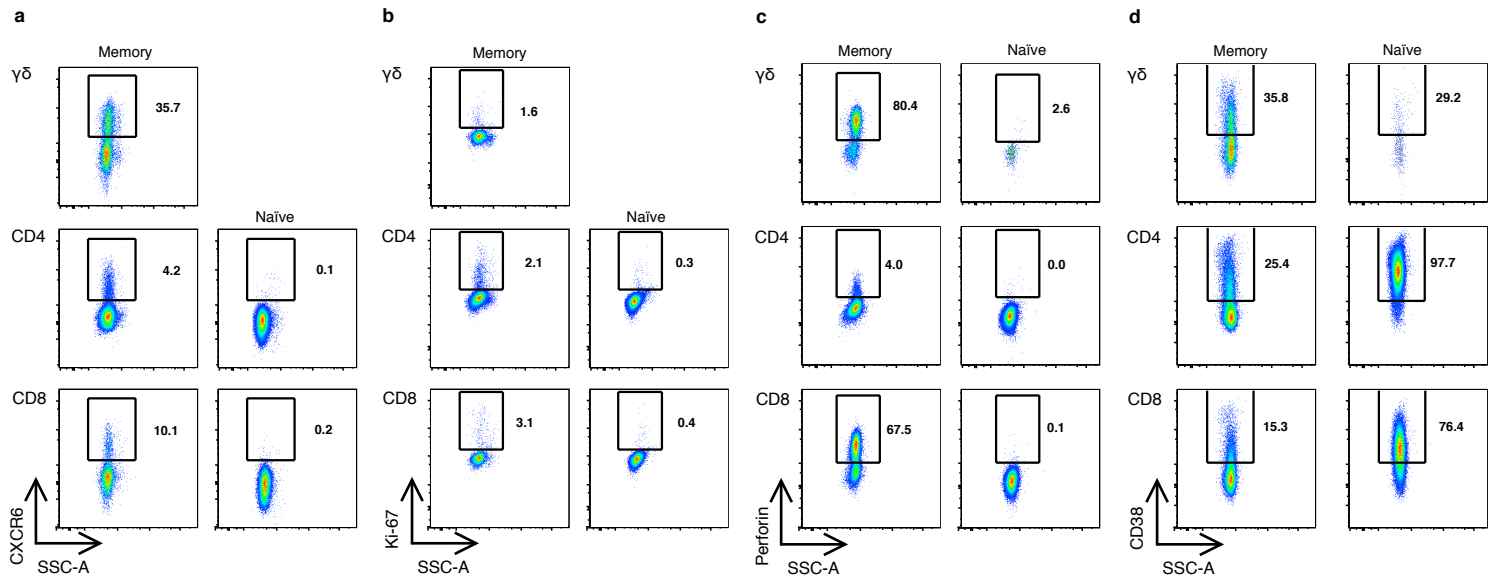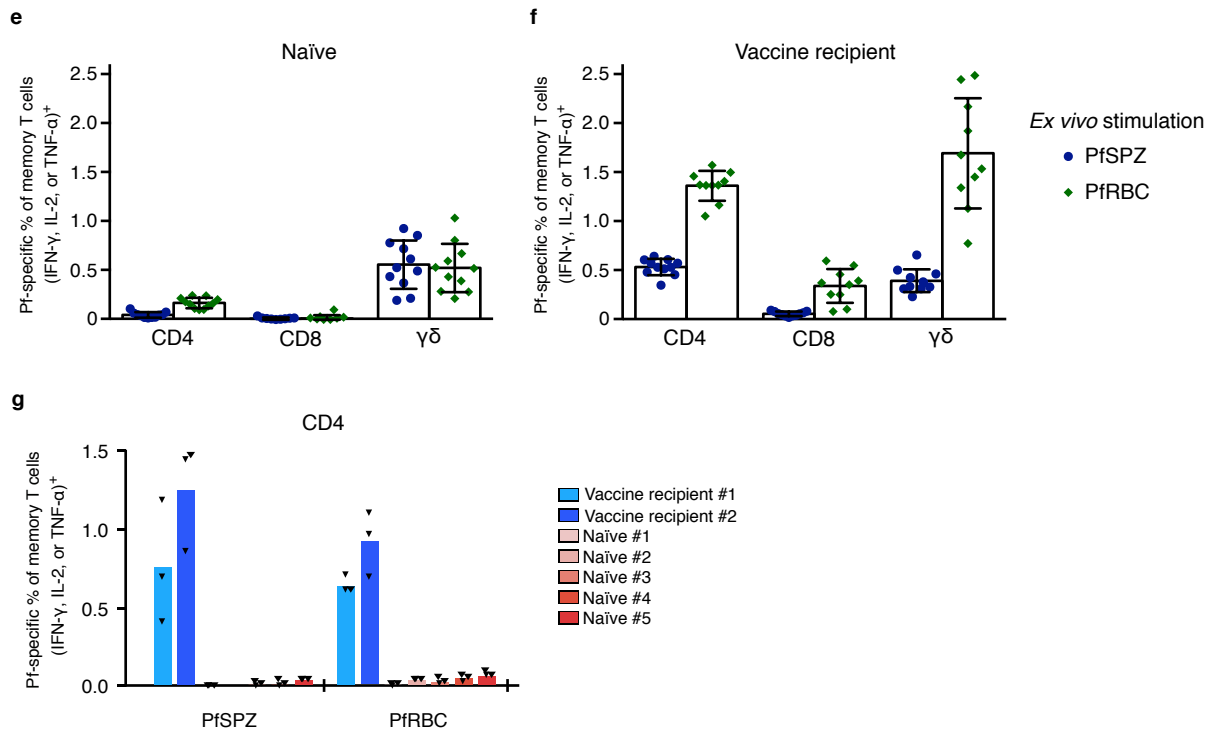

**Supplementary Figure 5** Flow cytometry gating of phenotypic markers and ICS assay reproducibility.

(a–b) Phenotype gates from Panel 1. Expression of CXCR6 (a) or Ki-67 (b) on memory (left) or naïve (right) cells from the  $\gamma\delta$ , CD4, or CD8 T cell lineages.

(c–d) Phenotype gates from Panel 2. Perforin (c) or CD38 (d) on memory (left) or naïve (right) cells from the  $\gamma\delta$ , CD4, or CD8 T cell lineages.

(e–g) Reproducibility of intracellular cytokine staining (ICS) assay.

For e–f, frozen PBMCs from one malaria-naïve donor and one PfSPZ Vaccine recipient were included in 10 consecutive assays on separate days analyzing PfSPZ or PfRBC responses from vaccinated and control subjects. The measured cytokine responses are reported for each lineage as mean  $\pm$  s.d. For g, three different operators stimulated and stained PBMCs from two vaccine recipients and five naïve controls, using two different staining panels and two different LSR IIs to further determine the variability in stimulation and staining. Bar denotes mean.

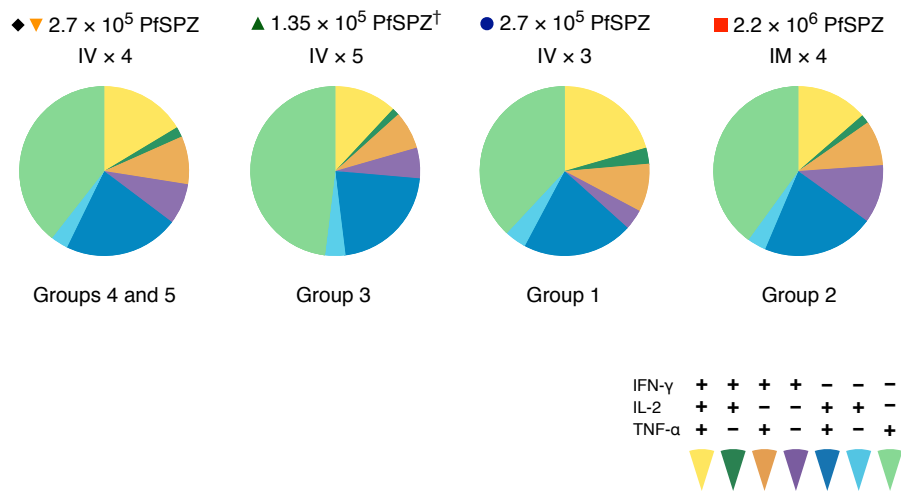

**Supplementary Figure 6** Quality of PfSPZ-specific cytokine-producing CD4 T cells by vaccine regimen. PBMCs from subjects taken 2 weeks after final vaccination were stimulated with PfSPZ or vaccine diluent (1% HSA) and stained for intracellular cytokine expression. The pie charts show the proportion of cells expressing any combination of IFN- $\gamma$ , IL-2, or TNF- $\alpha$  for each vaccine regimen. <sup>†</sup>Group 3 received four doses of  $1.35 \times 10^5$  PfSPZ and a fifth dose of  $4.5 \times 10^5$  PfSPZ.



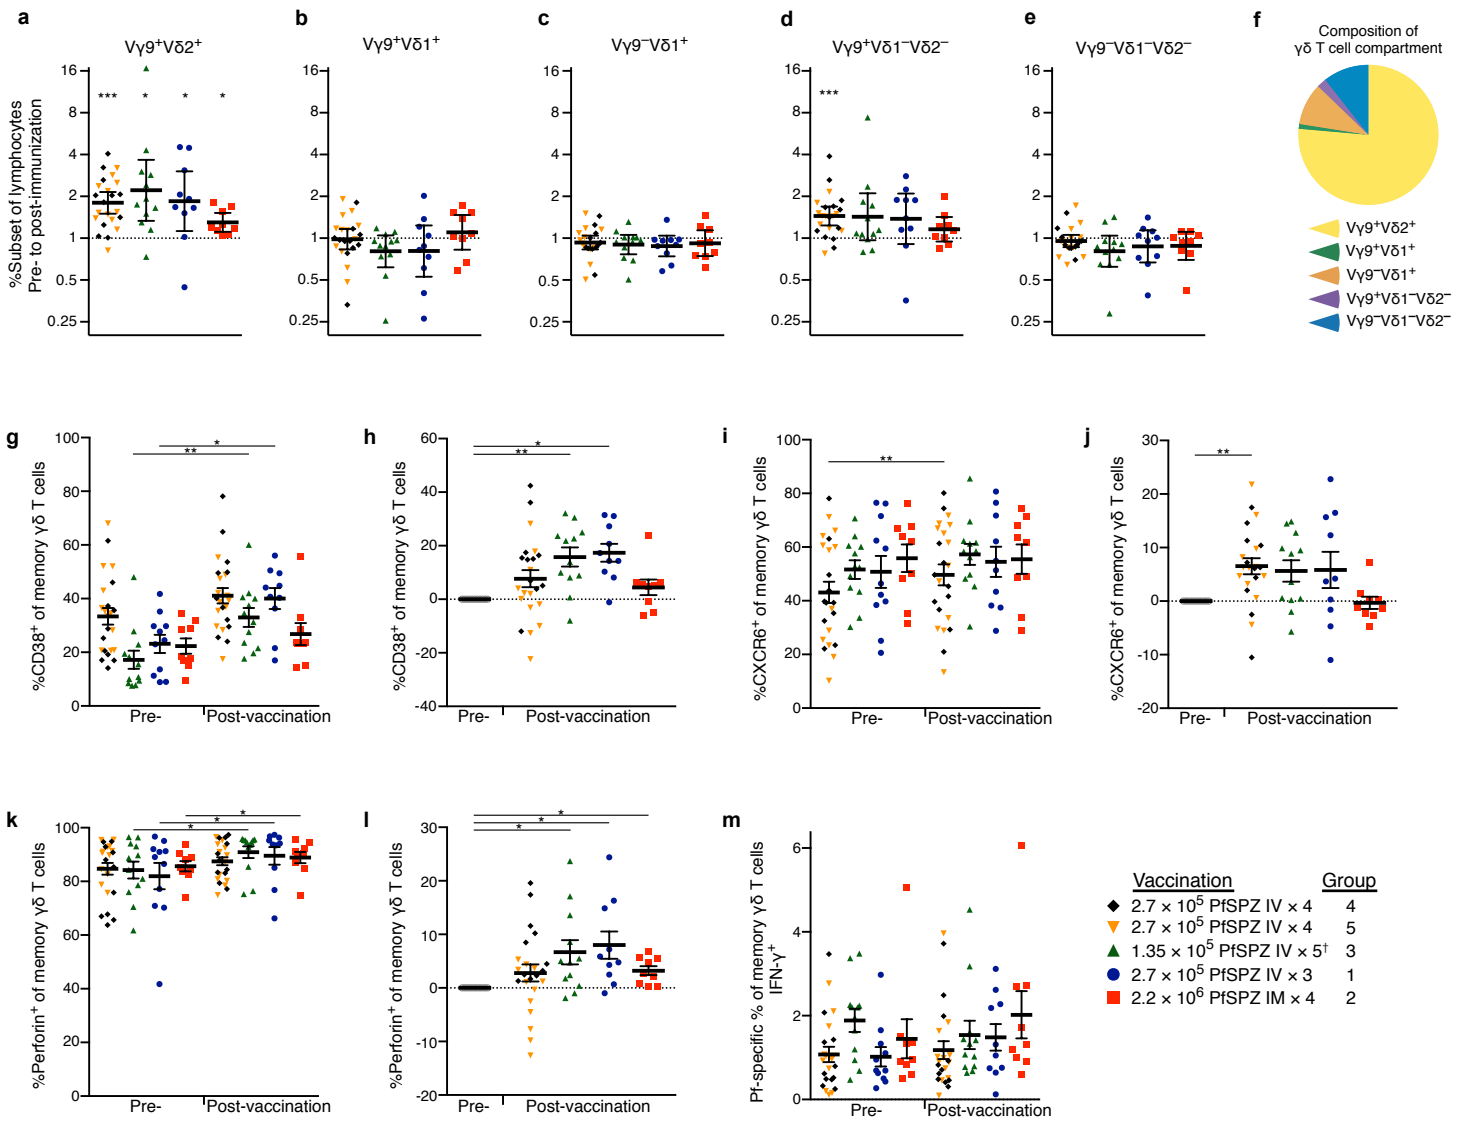

**Supplementary Figure 7** Sub-family and phenotypic analysis of  $\gamma\delta$  T cells following vaccination with PfSPZ.

(a–f) The frequency of the circulating  $\gamma\delta$  T cell subsets as a percentage of total lymphocytes was assessed in unstimulated PBMCs before the first immunization (pre-immunization) and 2 weeks after final immunization (post-immunization). Fold change from pre-vaccination to post-vaccination for (a)  $V\gamma 9^+V\delta 2^+$  (b)  $V\gamma 9^+V\delta 1^+$  (c)  $V\gamma 9^-V\delta 1^+$  (d)  $V\gamma 9^+V\delta 1^-V\delta 2^-$  or (e)  $V\gamma 9^-V\delta 1^-V\delta 2^-$  subsets. The frequency of  $V\gamma 9^-V\delta 2^+$  subset is low to undetectable.

(f) Relative frequencies of  $\gamma\delta$  T cell subsets in unstimulated PBMCs from 55 vaccine recipients from the pre-vaccination time point.

(g–l) Total memory  $\gamma\delta$  T cells were assessed pre- and post-immunization for the percent of cells expressing the activation marker CD38 (g,h), the liver-homing chemokine receptor CXCR6 (i,j), or the effector molecule perforin (k,l). The absolute frequencies are shown in g, i, and k and the change from pre- to post-vaccination is shown in h,j, and l.

(m) Pf-specific memory  $\gamma\delta$  T cells secreting IFN- $\gamma$  by intracellular cytokine staining (ICS) pre- and post-vaccination. Results are the percent of cytokine producing cells after incubation with PfSPZ minus percent of cells after incubation with vaccine diluent (medium with 1% HSA) as control.

For a–l, difference from pre-vaccine was assessed by Wilcoxon signed rank test. *P*-values were corrected for multiple comparisons by the Bonferroni method. \* *P* < 0.05, \*\* *P* < 0.01, \*\*\* *P* < 0.001. For a–e, data are geometric mean  $\pm$  95% c.i. For g–m, data are mean  $\pm$  s.e.m. †Group 3 received four doses of  $1.35 \times 10^5$  PfSPZ and a fifth dose of  $4.5 \times 10^5$  PfSPZ.

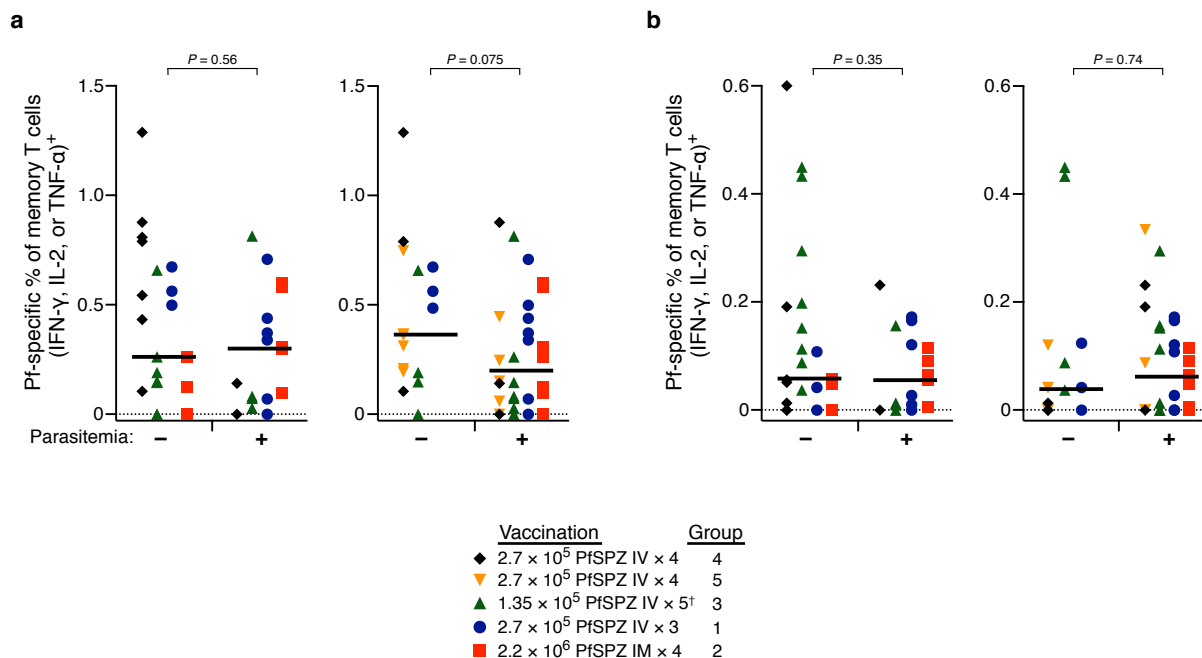

**Supplementary Figure 8** Comparison of cellular immune responses with CHMI outcome.

(a) PfSPZ-specific CD4 T cell cytokine responses were assessed 2 weeks after final immunization in subjects who did (+) and did not (-) develop parasitemia at 3 (left) and 21–25 week (right) CHMIs. Since we expected subjects who were parasitemic at 3 weeks to be parasitemic at 21–25 weeks (**Supplementary Fig. 1**), the immune data from individuals who were parasitemic at 3 weeks were included in the analysis at 21–25 weeks.

(b) PfRBC-specific CD8 T cell cytokine responses 2 weeks after final immunization in subjects who did (+) and did not (-) develop parasitemia at 3 (left) and 21–25 week (right) CHMIs. Subject inclusion was the same as in **a** above.

<sup>†</sup>Group 3 received four doses of  $1.35 \times 10^5$  PfSPZ and a fifth dose of  $4.5 \times 10^5$  PfSPZ.

PfSPZ stimulation

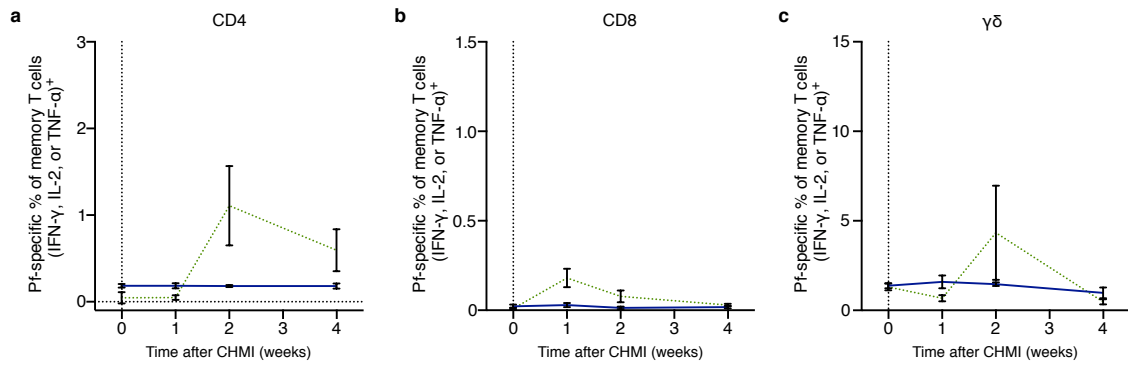

PfRBC stimulation

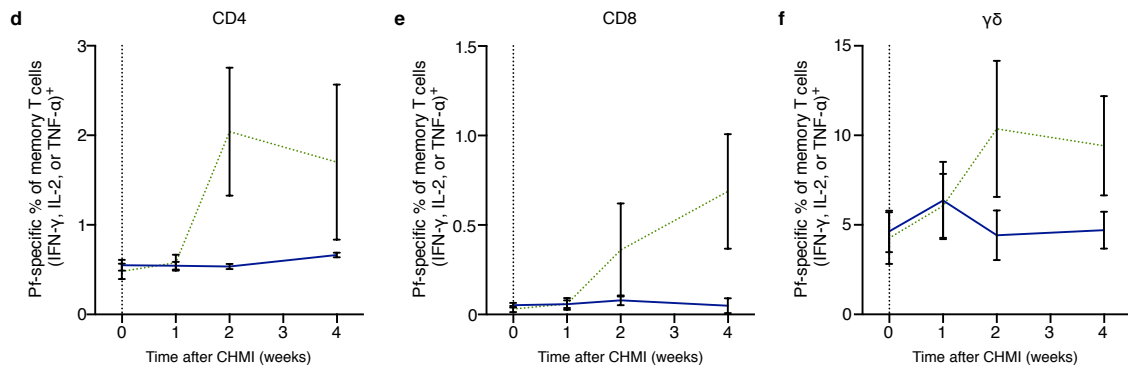

— Vaccine recipients, not parasitemic  
 ..... Unvaccinated controls, parasitemic

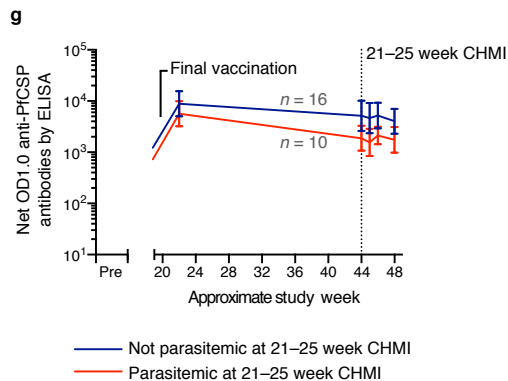

**Supplementary Figure 9** Magnitude of Pf-specific T cell and antibody responses after CHMI. Samples were taken at the time of CHMI, and 1, 2, and 4 weeks following CHMI 59 weeks after immunization in  $n = 5$  vaccine recipients who did not develop parasitemia and  $n = 5$  unvaccinated controls who developed parasitemia. **(a–c)** Magnitude of PfSPZ-specific CD4 **(a)**, CD8 **(b)**, and  $\gamma\delta$  **(c)** T cell response measured following stimulation of PBMCs with PfSPZ (background subtracted from vaccine diluent, 1% HSA). **(d–f)** Magnitude of PfRBC-specific CD4 **(d)**, CD8 **(e)**, and  $\gamma\delta$  **(f)** T cell response measured following stimulation of PBMCs with Pf-infected erythrocyte lysate (background subtracted from PBMCs stimulated with uninfected erythrocytes). **(g)** Antibodies to PfCSP by ELISA (net OD1.0) two weeks after final vaccination, and at the time of CHMI at 21–25 weeks, and 1, 2, and 4 weeks later. Pre-vaccination value is defined as 0 when calculating net OD1.0. Vaccine recipients from all groups (1–5) are included and divided into parasitemic vs. not parasitemic following 21–25 week CHMI. For **a–f**, data are mean  $\pm$  s.e.m. For **g**, data are geometric mean  $\pm$  95% c.i.

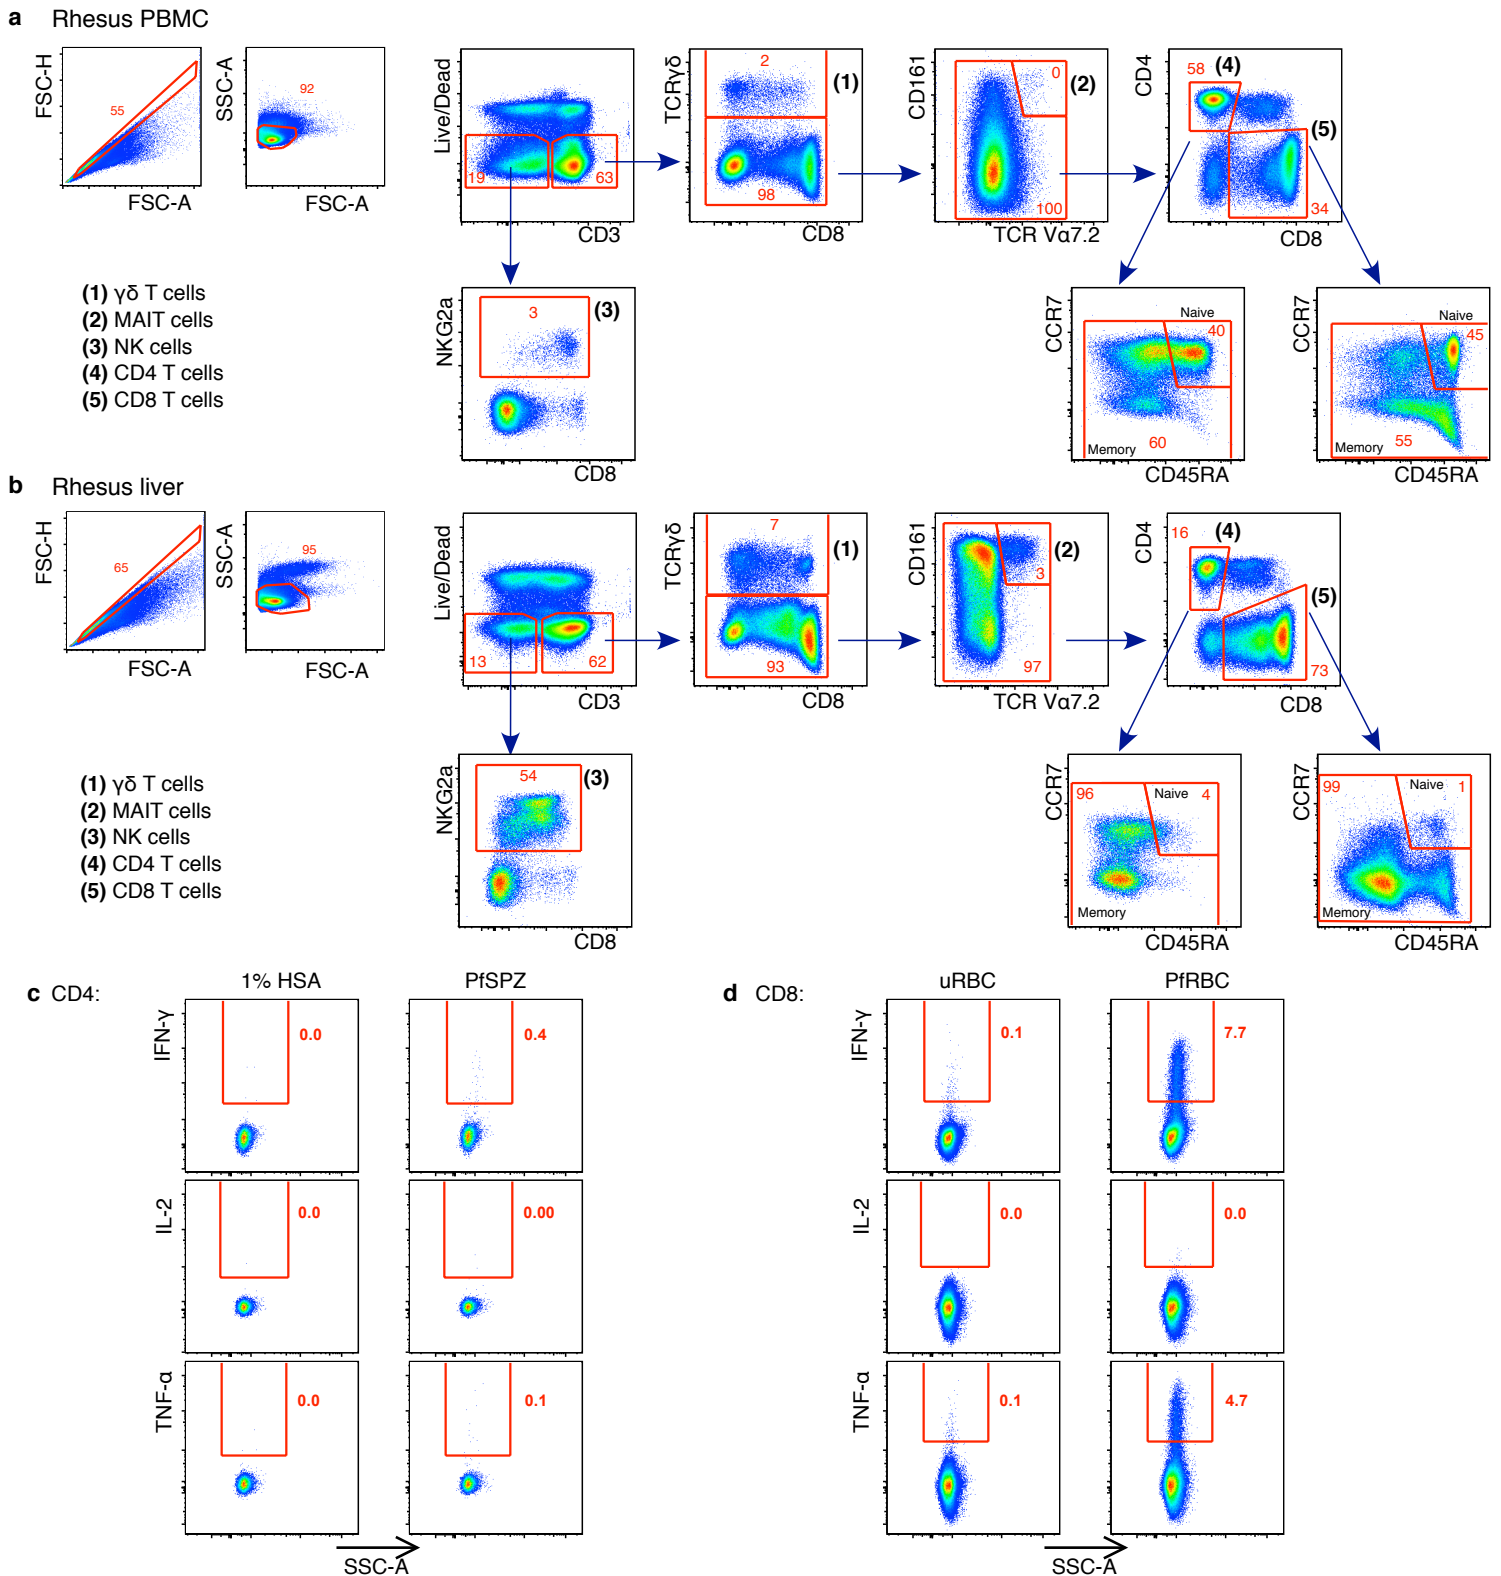

**Supplementary Figure 10** Gating tree for rhesus PBMCs and liver lymphocytes.

(a) Gating tree for NHP PBMCs identifies the same lymphocyte populations as in human PBMCs (**Supplementary Fig. 4**).

(b) Gating tree for NHP liver lymphocytes identifies the same lymphocyte populations as in human PBMCs (**Supplementary Fig. 4**) and rhesus PBMCs (a).

(c) Liver lymphocytes were stimulated with PfSPZ or vaccine diluent (1% HSA) and assessed for intracellular cytokine expression by flow cytometry. PfSPZ-specific CD4 T cells are identified by expression of any combination of IFN- $\gamma$ , IL-2, or TNF- $\alpha$ .

(d) Liver lymphocytes were stimulated with Pf-infected erythrocyte lysate (PfRBC) or uninfected control lymphocytes (uRBC) and assessed for intracellular cytokine expression by flow cytometry. PfRBC-specific CD8 T cells are identified by expression of any combination of IFN- $\gamma$ , IL-2, or TNF- $\alpha$ .

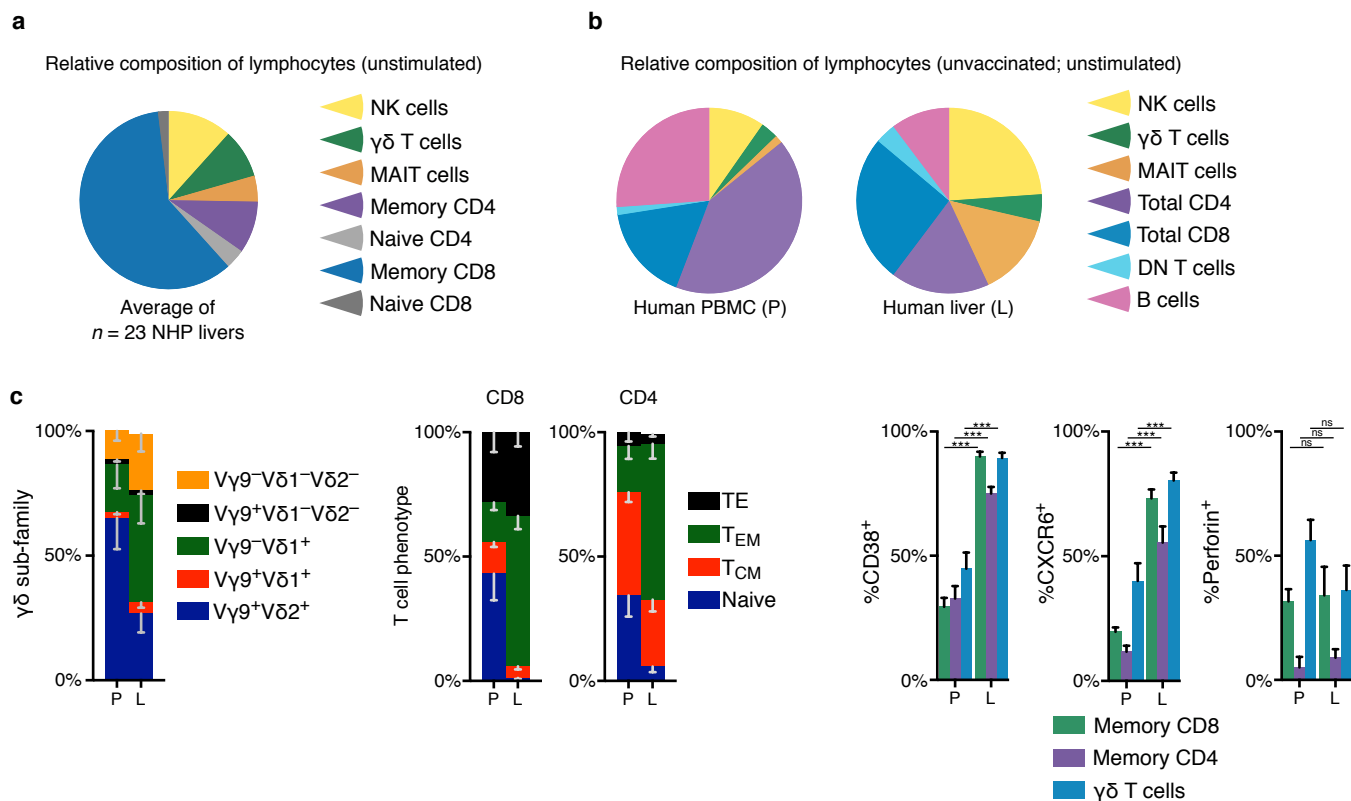

**Supplementary Figure 11** Lymphocyte lineages in rhesus and human liver.

(a) Average relative proportions of lymphocyte populations (NK cells,  $\gamma\delta$ , MAIT, naive and memory CD4 and CD8 T cells) are shown for 23 rhesus livers.

(b–e) Human PBMC ( $n = 7$ ) and human intrahepatic mononuclear cells (liver;  $n = 5$ ) were stained in parallel with the panels listed in **Supplementary Table 6**.

(b) Major lymphocyte subsets found in PBMC (P) and liver (L). DN =  $CD3^{+}TCR\gamma\delta^{-}$  (MAIT marker) $^{-}CD4^{-}CD8^{-}$ .

(c) Proportions of  $\gamma\delta$  sub-families in PBMC and liver.

(d) Memory phenotype of total CD8 (left) and CD4 (right) T cells in PBMC and liver.

(e) Expression of CD38, CXCR6, and perforin by memory CD8, CD4, and  $\gamma\delta$  T cells in PBMC and liver.

For c–e, data are mean  $\pm$  s.e.m. For e, comparisons between PBMC and liver was by two-way ANOVA with Bonferroni correction. ns, not significant ( $P > 0.05$ ); \*\*\*  $P < 0.001$ .

| Subject                          | Prior CHMI                 | Test  | Day | Repeat CHMI |   |   |    |    |    |    |    |    |    |    |    |    |  |  |  |  |  |  |  |  |  |  |  |
|----------------------------------|----------------------------|-------|-----|-------------|---|---|----|----|----|----|----|----|----|----|----|----|--|--|--|--|--|--|--|--|--|--|--|
|                                  |                            |       |     | 7           | 8 | 9 | 10 | 11 | 12 | 13 | 14 | 15 | 16 | 17 | 18 | 28 |  |  |  |  |  |  |  |  |  |  |  |
| 3.0 × 10 <sup>4</sup> PfSPZ × 6  | Jul 2012 #8<br><b>Pos</b>  | PCR   |     |             |   |   |    |    |    |    |    |    |    |    |    |    |  |  |  |  |  |  |  |  |  |  |  |
|                                  |                            | Smear |     |             |   |   |    |    |    |    |    |    |    |    |    |    |  |  |  |  |  |  |  |  |  |  |  |
| 3.0 × 10 <sup>4</sup> PfSPZ × 4  | Jul 2012 #13<br><b>Pos</b> | PCR   |     |             |   |   |    |    |    |    |    |    |    |    |    |    |  |  |  |  |  |  |  |  |  |  |  |
|                                  |                            | Smear |     |             |   |   |    |    |    |    |    |    |    |    |    |    |  |  |  |  |  |  |  |  |  |  |  |
| 3.0 × 10 <sup>4</sup> PfSPZ × 4  | Jul 2012 #14<br><b>Pos</b> | PCR   |     |             |   |   |    |    |    |    |    |    |    |    |    |    |  |  |  |  |  |  |  |  |  |  |  |
|                                  |                            | Smear |     |             |   |   |    |    |    |    |    |    |    |    |    |    |  |  |  |  |  |  |  |  |  |  |  |
| 3.0 × 10 <sup>4</sup> PfSPZ × 4  | Jul 2012 #16<br><b>Pos</b> | PCR   |     |             |   |   |    |    |    |    |    |    |    |    |    |    |  |  |  |  |  |  |  |  |  |  |  |
|                                  |                            | Smear |     |             |   |   |    |    |    |    |    |    |    |    |    |    |  |  |  |  |  |  |  |  |  |  |  |
| 1.35 × 10 <sup>5</sup> PfSPZ × 5 | Oct 2012 #3<br><b>Neg</b>  | PCR   |     |             |   |   |    |    |    |    |    |    |    |    |    |    |  |  |  |  |  |  |  |  |  |  |  |
|                                  |                            | Smear |     |             |   |   |    |    |    |    |    |    |    |    |    |    |  |  |  |  |  |  |  |  |  |  |  |
| 1.35 × 10 <sup>5</sup> PfSPZ × 5 | Oct 2012 #4<br><b>Neg</b>  | PCR   |     |             |   |   |    |    |    |    |    |    |    |    |    |    |  |  |  |  |  |  |  |  |  |  |  |
|                                  |                            | Smear |     |             |   |   |    |    |    |    |    |    |    |    |    |    |  |  |  |  |  |  |  |  |  |  |  |
| 1.35 × 10 <sup>5</sup> PfSPZ × 5 | Oct 2012 #5<br><b>Neg</b>  | PCR   |     |             |   |   |    |    |    |    |    |    |    |    |    |    |  |  |  |  |  |  |  |  |  |  |  |
|                                  |                            | Smear |     |             |   |   |    |    |    |    |    |    |    |    |    |    |  |  |  |  |  |  |  |  |  |  |  |
| 1.35 × 10 <sup>5</sup> PfSPZ × 4 | Oct 2012 #7<br><b>Pos</b>  | PCR   |     |             |   |   |    |    |    |    |    |    |    |    |    |    |  |  |  |  |  |  |  |  |  |  |  |
|                                  |                            | Smear |     |             |   |   |    |    |    |    |    |    |    |    |    |    |  |  |  |  |  |  |  |  |  |  |  |
| 1.35 × 10 <sup>5</sup> PfSPZ × 4 | Oct 2012 #9<br><b>Neg</b>  | PCR   |     |             |   |   |    |    |    |    |    |    |    |    |    |    |  |  |  |  |  |  |  |  |  |  |  |
|                                  |                            | Smear |     |             |   |   |    |    |    |    |    |    |    |    |    |    |  |  |  |  |  |  |  |  |  |  |  |
| 1.35 × 10 <sup>5</sup> PfSPZ × 4 | Oct 2012 #10<br><b>Pos</b> | PCR   |     |             |   |   |    |    |    |    |    |    |    |    |    |    |  |  |  |  |  |  |  |  |  |  |  |
|                                  |                            | Smear |     |             |   |   |    |    |    |    |    |    |    |    |    |    |  |  |  |  |  |  |  |  |  |  |  |
| 1.35 × 10 <sup>5</sup> PfSPZ × 4 | Oct 2012 #11<br><b>Neg</b> | PCR   |     |             |   |   |    |    |    |    |    |    |    |    |    |    |  |  |  |  |  |  |  |  |  |  |  |
|                                  |                            | Smear |     |             |   |   |    |    |    |    |    |    |    |    |    |    |  |  |  |  |  |  |  |  |  |  |  |
| 1.35 × 10 <sup>5</sup> PfSPZ × 4 | Oct 2012 #12<br><b>Pos</b> | PCR   |     |             |   |   |    |    |    |    |    |    |    |    |    |    |  |  |  |  |  |  |  |  |  |  |  |
|                                  |                            | Smear |     |             |   |   |    |    |    |    |    |    |    |    |    |    |  |  |  |  |  |  |  |  |  |  |  |
| 1.35 × 10 <sup>5</sup> PfSPZ × 4 | Oct 2012 #14<br><b>Neg</b> | PCR   |     |             |   |   |    |    |    |    |    |    |    |    |    |    |  |  |  |  |  |  |  |  |  |  |  |
|                                  |                            | Smear |     |             |   |   |    |    |    |    |    |    |    |    |    |    |  |  |  |  |  |  |  |  |  |  |  |
| Prior control                    | Oct 2012 #17<br><b>Pos</b> | PCR   |     |             |   |   |    |    |    |    |    |    |    |    |    |    |  |  |  |  |  |  |  |  |  |  |  |
|                                  |                            | Smear |     |             |   |   |    |    |    |    |    |    |    |    |    |    |  |  |  |  |  |  |  |  |  |  |  |
| Prior control                    | Oct 2012 #18<br><b>Neg</b> | PCR   |     |             |   |   |    |    |    |    |    |    |    |    |    |    |  |  |  |  |  |  |  |  |  |  |  |
|                                  |                            | Smear |     |             |   |   |    |    |    |    |    |    |    |    |    |    |  |  |  |  |  |  |  |  |  |  |  |
| Prior control                    | Oct 2012 #19<br><b>Pos</b> | PCR   |     |             |   |   |    |    |    |    |    |    |    |    |    |    |  |  |  |  |  |  |  |  |  |  |  |
|                                  |                            | Smear |     |             |   |   |    |    |    |    |    |    |    |    |    |    |  |  |  |  |  |  |  |  |  |  |  |
| New control                      | --                         | PCR   |     |             |   |   |    |    |    |    |    |    |    |    |    |    |  |  |  |  |  |  |  |  |  |  |  |
|                                  |                            | Smear |     |             |   |   |    |    |    |    |    |    |    |    |    |    |  |  |  |  |  |  |  |  |  |  |  |
| New control                      | --                         | PCR   |     |             |   |   |    |    |    |    |    |    |    |    |    |    |  |  |  |  |  |  |  |  |  |  |  |
|                                  |                            | Smear |     |             |   |   |    |    |    |    |    |    |    |    |    |    |  |  |  |  |  |  |  |  |  |  |  |
| New control                      | --                         | PCR   |     |             |   |   |    |    |    |    |    |    |    |    |    |    |  |  |  |  |  |  |  |  |  |  |  |
|                                  |                            | Smear |     |             |   |   |    |    |    |    |    |    |    |    |    |    |  |  |  |  |  |  |  |  |  |  |  |
| New control                      | --                         | PCR   |     |             |   |   |    |    |    |    |    |    |    |    |    |    |  |  |  |  |  |  |  |  |  |  |  |
|                                  |                            | Smear |     |             |   |   |    |    |    |    |    |    |    |    |    |    |  |  |  |  |  |  |  |  |  |  |  |
| New control                      | --                         | PCR   |     |             |   |   |    |    |    |    |    |    |    |    |    |    |  |  |  |  |  |  |  |  |  |  |  |
|                                  |                            | Smear |     |             |   |   |    |    |    |    |    |    |    |    |    |    |  |  |  |  |  |  |  |  |  |  |  |
| New control                      | --                         | PCR   |     |             |   |   |    |    |    |    |    |    |    |    |    |    |  |  |  |  |  |  |  |  |  |  |  |
|                                  |                            | Smear |     |             |   |   |    |    |    |    |    |    |    |    |    |    |  |  |  |  |  |  |  |  |  |  |  |

Red box, positive PCR; blue box, negative PCR; orange box, positive blood smear; green box, negative blood smear. Black border surrounds days of atovaquone/proguanil treatment.

**Supplementary Table 1** PCR and blood smear following repeat CHMI (VRC 312).

In the VRC 312 study, a repeat CHMI was conducted February 2013 at 21–36 weeks after final vaccination to assess the durability of vaccine efficacy. The participants included 3 prior unvaccinated controls and 13 vaccine recipients that underwent CHMI 3 weeks after their final immunization from across dose groups and 6 new unvaccinated controls. “Pos” (red) and “Neg” (blue) refers to the outcome after the prior CHMI (parasitemia or no parasitemia, respectively). Supplementary Table 1 shows daily PCR and blood smear results following CHMI for all volunteers.

For this CHMI, the study protocol allowed for malaria diagnosis under any the following criteria: a positive blood smear; two consecutive positive PCRs; or one positive PCR with signs or symptoms of malaria. Both blood smear and PCR were performed daily starting on day 7 after CHMI. Post-hoc analysis of smear vs. PCR diagnostic assays revealed that using 2 positive PCR (even if not on consecutive days) as the criteria for treatment resulted in 10 of 19 subjects with parasitemia beginning treatment 1 day earlier, while none would have started treatment later. Based on these data, two positive PCR (even if not on consecutive days) were used as the primary diagnostic criteria in the VRC 314 clinical study.

| Supplementary Table 2 Baseline characteristics of participants.                                                                                                                                                                                         |                                                                   |                                                                  |                                                                  |                                      |                                                                   |                                                                   |                                      |
|---------------------------------------------------------------------------------------------------------------------------------------------------------------------------------------------------------------------------------------------------------|-------------------------------------------------------------------|------------------------------------------------------------------|------------------------------------------------------------------|--------------------------------------|-------------------------------------------------------------------|-------------------------------------------------------------------|--------------------------------------|
| Characteristic                                                                                                                                                                                                                                          | Site 1 – UMD                                                      |                                                                  |                                                                  | Site 2 – VRC                         |                                                                   |                                                                   |                                      |
|                                                                                                                                                                                                                                                         | Grp 1 (●)<br>2.7 × 10 <sup>5</sup><br>PfSPZ<br>IV × 3<br>(n = 12) | Grp 2 (■)<br>2.2 × 10 <sup>6</sup><br>PfSPZ<br>IM × 4<br>(n = 9) | Grp 3 (▲)<br>1.35 × 10 <sup>5</sup><br>PfSPZ<br>IV**<br>(n = 12) | UMD<br>CHMI<br>controls<br>(*n = 20) | Grp 4 (◆)<br>2.7 × 10 <sup>5</sup><br>PfSPZ<br>IV × 4<br>(n = 12) | Grp 5 (▼)<br>2.7 × 10 <sup>5</sup><br>PfSPZ<br>IV × 4<br>(n = 12) | VRC<br>CHMI<br>controls<br>(*n = 16) |
| <b>Sex – no. (%)</b>                                                                                                                                                                                                                                    |                                                                   |                                                                  |                                                                  |                                      |                                                                   |                                                                   |                                      |
| Female                                                                                                                                                                                                                                                  | 5 (41.7)                                                          | 5 (55.6)                                                         | 2 (16.7)                                                         | 9 (45.0)                             | 6 (50)                                                            | 2 (16.7)                                                          | 6 (37.5)                             |
| Male                                                                                                                                                                                                                                                    | 7 (58.3)                                                          | 4 (44.4)                                                         | 10 (83.3)                                                        | 11 (55.0)                            | 6 (50)                                                            | 10 (83.3)                                                         | 10 (62.5)                            |
| <b>Age – years</b>                                                                                                                                                                                                                                      |                                                                   |                                                                  |                                                                  |                                      |                                                                   |                                                                   |                                      |
| Mean                                                                                                                                                                                                                                                    | 28.5                                                              | 28.9                                                             | 34.2                                                             | 30.3                                 | 30.6                                                              | 32.3                                                              | 29.6                                 |
| Range                                                                                                                                                                                                                                                   | [22, 38]                                                          | [23, 45]                                                         | [22, 45]                                                         | [21, 45]                             | [22, 42]                                                          | [23, 45]                                                          | [22, 41]                             |
| <b>Race – no. (%)</b>                                                                                                                                                                                                                                   |                                                                   |                                                                  |                                                                  |                                      |                                                                   |                                                                   |                                      |
| Asian                                                                                                                                                                                                                                                   | 1 (8.3)                                                           | 1 (11.1)                                                         | 1 (8.3)                                                          | 2 (10.0)                             | 1 (8.3)                                                           | 0 (0)                                                             | 2 (12.5)                             |
| Black/African American                                                                                                                                                                                                                                  | 2 (16.7)                                                          | 1 (11.1)                                                         | 7 (58.3)                                                         | 9 (45.0)                             | 3 (25.0)                                                          | 1 (8.3)                                                           | 2 (12.5)                             |
| White                                                                                                                                                                                                                                                   | 9 (75.0)                                                          | 7 (77.8)                                                         | 3 (25.0)                                                         | 8 (40.0)                             | 7 (58.3)                                                          | 10 (83.3)                                                         | 10 (62.5)                            |
| Other races combined                                                                                                                                                                                                                                    | 0 (0)                                                             | 0 (0)                                                            | 1 (8.3)                                                          | 1 (5.0)                              | 1 (8.3)                                                           | 1 (8.3)                                                           | 2 (12.5)                             |
| <b>Ethnicity – no (%)</b>                                                                                                                                                                                                                               |                                                                   |                                                                  |                                                                  |                                      |                                                                   |                                                                   |                                      |
| Non-Hispanic/Latino                                                                                                                                                                                                                                     | 12 (100)                                                          | 8 (88.9)                                                         | 12 (100)                                                         | 19 (95.0)                            | 12 (100)                                                          | 11 (91.7)                                                         | 16 (100)                             |
| Hispanic/Latino                                                                                                                                                                                                                                         | 0 (0)                                                             | 1 (11.1)                                                         | 0 (0)                                                            | 1 (5.0)                              | 0 (0)                                                             | 1 (8.3)                                                           | 0 (0)                                |
| <b>Body mass index (BMI)</b>                                                                                                                                                                                                                            |                                                                   |                                                                  |                                                                  |                                      |                                                                   |                                                                   |                                      |
| Mean (s.d.)                                                                                                                                                                                                                                             | 23.2 (4.9)                                                        | 23.2 (2.7)                                                       | 26.2 (4.1)                                                       | 26.8 (5.2)                           | 25.2 (3.4)                                                        | 27.1 (4.1)                                                        | 26.1 (4.4)                           |
| Range                                                                                                                                                                                                                                                   | [16, 35]                                                          | [20, 27]                                                         | [20, 33]                                                         | [19, 37]                             | [20, 33]                                                          | [23, 34]                                                          | [20, 35]                             |
| <b>Education – no. (%)</b>                                                                                                                                                                                                                              |                                                                   |                                                                  |                                                                  |                                      |                                                                   |                                                                   |                                      |
| <High school graduate                                                                                                                                                                                                                                   | 1 (8.3)                                                           | 0 (0)                                                            | 2 (16.7)                                                         | 2 (10.0)                             | 0 (0)                                                             | 0 (0)                                                             | 0 (0)                                |
| High school/GED                                                                                                                                                                                                                                         | 0 (0)                                                             | 0 (0)                                                            | 3 (25.0)                                                         | 5 (25.0)                             | 0 (0)                                                             | 2 (16.7)                                                          | 3 (18.8)                             |
| College graduate                                                                                                                                                                                                                                        | 6 (50.0)                                                          | 8 (88.9)                                                         | 3 (25.0)                                                         | 5 (25.0)                             | 7 (58.3)                                                          | 7 (58.3)                                                          | 8 (50.0)                             |
| Advanced degree                                                                                                                                                                                                                                         | 5 (41.7)                                                          | 1 (11.1)                                                         | 4 (33.3)                                                         | 8 (40.0)                             | 5 (41.7)                                                          | 3 (25.0)                                                          | 5 (31.3)                             |
| *Includes back-up control subjects who did not participate in a controlled human malaria infection (CHMI).                                                                                                                                              |                                                                   |                                                                  |                                                                  |                                      |                                                                   |                                                                   |                                      |
| **Group 3 was enrolled to receive 5 vaccinations at 1.35 × 10 <sup>5</sup> PfSPZ IV. By protocol amendment, these subjects were offered the option of the 4.5 × 10 <sup>5</sup> PfSPZ dose for the 5 <sup>th</sup> vaccination; 11 opted for this dose. |                                                                   |                                                                  |                                                                  |                                      |                                                                   |                                                                   |                                      |

| Group | Dose (PfSPZ)                                                         | Route | Inj. # | Regimen (weeks) | Subject ID | CHMI #1 (days) | CHMI #2 (days) | CHMI #3 (days) |
|-------|----------------------------------------------------------------------|-------|--------|-----------------|------------|----------------|----------------|----------------|
| 1 ●   | $2.7 \times 10^5$                                                    | IV    | 3      | 0, 4, 20        | 102        | 21             | .              | .              |
|       |                                                                      |       |        |                 | 103        | 23             | 175            | .              |
|       |                                                                      |       |        |                 | 104        | .              | 175            | .              |
|       |                                                                      |       |        |                 | 105        | 22             | .              | .              |
|       |                                                                      |       |        |                 | 106        | 22             | 175            | .              |
|       |                                                                      |       |        |                 | 107        | .              | 175            | .              |
|       |                                                                      |       |        |                 | 108        | 22             | .              | .              |
|       |                                                                      |       |        |                 | 109        | 22             | 175            | .              |
|       |                                                                      |       |        |                 | 110        | 22             | .              | .              |
|       |                                                                      |       |        |                 | 111        | 22             | .              | .              |
|       |                                                                      |       |        |                 | 112        | 22             | .              | .              |
| 2 ■   | $2.2 \times 10^6$                                                    | IM    | 4      | 0, 4, 8, 20     | 201        | 22             | .              | .              |
|       |                                                                      |       |        |                 | 202        | 22             | .              | .              |
|       |                                                                      |       |        |                 | 203        | 22             | .              | .              |
|       |                                                                      |       |        |                 | 204        | 22             | 175            | .              |
|       |                                                                      |       |        |                 | 205        | 22             | 174            | .              |
|       |                                                                      |       |        |                 | 206        | 21**           | .              | .              |
|       |                                                                      |       |        |                 | 207        | 22             | 174            | .              |
|       |                                                                      |       |        |                 | 208        | 21             | .              | .              |
|       |                                                                      |       |        |                 | 209        | 22             | .              | .              |
| 3 ▲   | $1.35 \times 10^5$<br>(dose #1-4),<br>$4.5 \times 10^5$<br>(dose #5) | IV    | 5      | 0, 4, 8, 12, 20 | 301        | 21             | .              | .              |
|       |                                                                      |       |        |                 | 302        | 22             | 174            | .              |
|       |                                                                      |       |        |                 | 303        | 22             | 174            | .              |
|       |                                                                      |       |        |                 | 304        | 22             | .              | .              |
|       |                                                                      |       |        |                 | 305        | 21             | .              | .              |
|       |                                                                      |       |        |                 | 306        | 22             | 174            | .              |
|       |                                                                      |       |        |                 | 307*       | 22             | .              | .              |
|       |                                                                      |       |        |                 | 308        | 21             | 174**          | .              |
|       |                                                                      |       |        |                 | 309        | 22             | 174            | .              |
|       |                                                                      |       |        |                 | 310        | 22             | 174            | .              |
|       |                                                                      |       |        |                 | 311        | 22             | 174            | .              |
|       |                                                                      |       |        |                 | 312        | 21             | 174            | .              |
| 4 ◆   | $2.7 \times 10^5$                                                    | IV    | 4      | 0, 4, 8, 20     | 401        | 27             | 167            | .              |
|       |                                                                      |       |        |                 | 402        | 27             | 167            | .              |
|       |                                                                      |       |        |                 | 403        | 27             | .              | .              |
|       |                                                                      |       |        |                 | 405        | 21             | .              | .              |
|       |                                                                      |       |        |                 | 406        | 22             | .              | .              |
|       |                                                                      |       |        |                 | 407        | 21             | 161            | .              |
|       |                                                                      |       |        |                 | 408        | 22             | .              | 427            |
|       |                                                                      |       |        |                 | 411        | 15             | .              | .              |
| 412   | 26                                                                   | 166   | .      |                 |            |                |                |                |
| 5 ▼   | $2.7 \times 10^5$                                                    | IV    | 4      | 0, 4, 8, 20     | 501        | .              | 147            | .              |
|       |                                                                      |       |        |                 | 502        | .              | 147            | 412            |
|       |                                                                      |       |        |                 | 504        | .              | 159            | .              |
|       |                                                                      |       |        |                 | 505        | .              | 145            | .              |
|       |                                                                      |       |        |                 | 506        | .              | 141            | 406            |
|       |                                                                      |       |        |                 | 507        | .              | 145            | .              |
|       |                                                                      |       |        |                 | 508        | .              | 145            | 410            |
|       |                                                                      |       |        |                 | 509        | .              | 146            | .              |
|       |                                                                      |       |        |                 | 510        | .              | 147            | .              |
|       |                                                                      |       |        |                 | 511        | .              | 147            | 412            |
|       |                                                                      |       |        |                 | 512        | .              | 146            | .              |

**Supplementary Table 3** Groups, vaccinations, and days of CHMIs.

\*Received 5 doses of  $1.35 \times 10^5$  PfSPZ

\*\*Did not complete CHMI follow-up and excluded from further analysis

**Red** indicates that the subject developed parasitemia following CHMI.

**Blue** indicates that the subject did not develop parasitemia following CHMI



**Supplementary Table 4** Local reactogenicity of PfSPZ Vaccine administration by group.

|                                                                                                                                                                                                                                                        | Grp 1 (●)<br>2.7 × 10 <sup>5</sup><br>PfSPZ<br>IV × 3<br>(n = 12) | Grp 2 (■)<br>2.2 × 10 <sup>6</sup><br>PfSPZ<br>IM × 4<br>(n = 9) | *Grp 3 (▲)<br>1.35 × 10 <sup>5</sup><br>PfSPZ<br>IV<br>(n = 12) | *Grp 3 (▲)<br>4.5 × 10 <sup>5</sup><br>PfSPZ<br>IV<br>(n = 11) | Grp 4 (◆)<br>2.7 × 10 <sup>5</sup><br>PfSPZ<br>IV × 4<br>(n = 12) | Grp 5 (▼)<br>2.7 × 10 <sup>5</sup><br>PfSPZ<br>IV × 4<br>(n = 12) |
|--------------------------------------------------------------------------------------------------------------------------------------------------------------------------------------------------------------------------------------------------------|-------------------------------------------------------------------|------------------------------------------------------------------|-----------------------------------------------------------------|----------------------------------------------------------------|-------------------------------------------------------------------|-------------------------------------------------------------------|
|                                                                                                                                                                                                                                                        | no. (%)                                                           |                                                                  |                                                                 |                                                                |                                                                   |                                                                   |
| <b>Pain/tenderness</b>                                                                                                                                                                                                                                 |                                                                   |                                                                  |                                                                 |                                                                |                                                                   |                                                                   |
| None                                                                                                                                                                                                                                                   | 8 (66.7)                                                          | 4 (44.4)                                                         | 12 (100)                                                        | 11 (100)                                                       | 8 (66.7)                                                          | 11(91.7)                                                          |
| Mild                                                                                                                                                                                                                                                   | 3 (25.0)                                                          | 5 (55.6)                                                         | 0 (0)                                                           | 0 (0)                                                          | 4 (33.3)                                                          | 1 (8.3)                                                           |
| Moderate                                                                                                                                                                                                                                               | 1 (8.3)                                                           | 0 (0)                                                            | 0 (0)                                                           | 0 (0)                                                          | 0 (0)                                                             | 0 (0)                                                             |
| Severe                                                                                                                                                                                                                                                 | 0 (0)                                                             | 0 (0)                                                            | 0 (0)                                                           | 0 (0)                                                          | 0 (0)                                                             | 0 (0)                                                             |
| <b>Swelling</b>                                                                                                                                                                                                                                        |                                                                   |                                                                  |                                                                 |                                                                |                                                                   |                                                                   |
| None                                                                                                                                                                                                                                                   | 12 (100)                                                          | 9 (100)                                                          | 12 (100)                                                        | 11 (100)                                                       | 12 (100)                                                          | 12 (100)                                                          |
| Mild                                                                                                                                                                                                                                                   | 0 (0)                                                             | 0 (0)                                                            | 0 (0)                                                           | 0 (0)                                                          | 0 (0)                                                             | 0 (0)                                                             |
| Moderate                                                                                                                                                                                                                                               | 0 (0)                                                             | 0 (0)                                                            | 0 (0)                                                           | 0 (0)                                                          | 0 (0)                                                             | 0 (0)                                                             |
| Severe                                                                                                                                                                                                                                                 | 0 (0)                                                             | 0 (0)                                                            | 0 (0)                                                           | 0 (0)                                                          | 0 (0)                                                             | 0 (0)                                                             |
| <b>Redness</b>                                                                                                                                                                                                                                         |                                                                   |                                                                  |                                                                 |                                                                |                                                                   |                                                                   |
| None                                                                                                                                                                                                                                                   | 12 (100)                                                          | 9 (100)                                                          | 11 (91.7)                                                       | 11 (100)                                                       | 11 (91.7)                                                         | 12 (100)                                                          |
| Mild                                                                                                                                                                                                                                                   | 0 (0)                                                             | 0 (0)                                                            | 1 (8.3)                                                         | 0 (0)                                                          | 1 (8.3)                                                           | 0 (0)                                                             |
| Moderate                                                                                                                                                                                                                                               | 0 (0)                                                             | 0 (0)                                                            | 0 (0)                                                           | 0 (0)                                                          | 0 (0)                                                             | 0 (0)                                                             |
| Severe                                                                                                                                                                                                                                                 | 0 (0)                                                             | 0 (0)                                                            | 0 (0)                                                           | 0 (0)                                                          | 0 (0)                                                             | 0 (0)                                                             |
| <b>Any local symptom</b>                                                                                                                                                                                                                               |                                                                   |                                                                  |                                                                 |                                                                |                                                                   |                                                                   |
| None                                                                                                                                                                                                                                                   | 8 (66.7)                                                          | 4 (44.4)                                                         | 11 (91.7)                                                       | 11 (100)                                                       | 7(58.3)                                                           | 11 (91.7)                                                         |
| Mild                                                                                                                                                                                                                                                   | 3 (25.0)                                                          | 5 (55.6)                                                         | 1 (8.3)                                                         | 0 (0)                                                          | 5 (41.7)                                                          | 1 (8.3)                                                           |
| Moderate                                                                                                                                                                                                                                               | 1 (8.3)                                                           | 0 (0)                                                            | 0 (0)                                                           | 0 (0)                                                          | 0 (0)                                                             | 0 (0)                                                             |
| Severe                                                                                                                                                                                                                                                 | 0 (0)                                                             | 0 (0)                                                            | 0 (0)                                                           | 0 (0)                                                          | 0 (0)                                                             | 0 (0)                                                             |
| Local and systemic reactogenicity for each group is reported as the “worst severity” reported at any time in the 3 days after any vaccination administered at the indicated dose.                                                                      |                                                                   |                                                                  |                                                                 |                                                                |                                                                   |                                                                   |
| *Group 3 was enrolled to receive 5 vaccinations at 1.35 × 10 <sup>5</sup> PfSPZ IV. By protocol amendment, these subjects were offered the option of the 4.5 × 10 <sup>5</sup> PfSPZ dose for the 5 <sup>th</sup> vaccination; 11 opted for this dose. |                                                                   |                                                                  |                                                                 |                                                                |                                                                   |                                                                   |

**Supplementary Table 5** Systemic reactivity of PfSPZ Vaccine administration by group.

|                     | Grp 1 (●)<br>2.7 × 10 <sup>5</sup><br>PfSPZ<br>IV × 3<br>(n = 12) | Grp 2 (■)<br>2.2 × 10 <sup>6</sup><br>PfSPZ<br>IM × 4<br>(n = 9) | *Grp 3 (▲)<br>1.35 × 10 <sup>5</sup><br>PfSPZ<br>IV<br>(n = 12) | *Grp 3 (▲)<br>4.5 × 10 <sup>5</sup><br>PfSPZ<br>IV<br>(n = 11) | Grp 4 (◆)<br>2.7 × 10 <sup>5</sup><br>PfSPZ<br>IV × 4<br>(n = 12) | Grp 5 (▼)<br>2.7 × 10 <sup>5</sup><br>PfSPZ<br>IV × 4<br>(n = 12) |
|---------------------|-------------------------------------------------------------------|------------------------------------------------------------------|-----------------------------------------------------------------|----------------------------------------------------------------|-------------------------------------------------------------------|-------------------------------------------------------------------|
|                     | no. (%)                                                           |                                                                  |                                                                 |                                                                |                                                                   |                                                                   |
| <b>Malaise</b>      |                                                                   |                                                                  |                                                                 |                                                                |                                                                   |                                                                   |
| None                | 8 (66.7)                                                          | 7 (77.8)                                                         | 9 (75.0)                                                        | 11 (100)                                                       | 5 (41.7)                                                          | 9 (75.0)                                                          |
| Mild                | 3 (25.0)                                                          | 1 (11.1)                                                         | 3 (25.0)                                                        | 0 (0)                                                          | 5 (41.7)                                                          | 2 (16.7)                                                          |
| Moderate            | 1 (8.3)                                                           | 1 (11.1)                                                         | 0 (0)                                                           | 0 (0)                                                          | 2 (16.7)                                                          | 1 (8.3)                                                           |
| Severe              | 0 (0)                                                             | 0 (0)                                                            | 0 (0)                                                           | 0 (0)                                                          | 0 (0)                                                             | 0 (0)                                                             |
| <b>Myalgia</b>      |                                                                   |                                                                  |                                                                 |                                                                |                                                                   |                                                                   |
| None                | 7 (58.3)                                                          | 7 (77.8)                                                         | 10 (83)                                                         | 11 (100)                                                       | 7 (58.3)                                                          | 11 (91.7)                                                         |
| Mild                | 3 (25.0)                                                          | 2 (22.2)                                                         | 2 (16.7)                                                        | 0 (0)                                                          | 4 (33.3)                                                          | 1 (8.3)                                                           |
| Moderate            | 2 (16.7)                                                          | 0 (0)                                                            | 0 (0)                                                           | 0 (0)                                                          | 1 (8.3)                                                           | 0 (0)                                                             |
| Severe              | 0 (0)                                                             | 0 (0)                                                            | 0 (0)                                                           | 0 (0)                                                          | 0 (0)                                                             | 0 (0)                                                             |
| <b>Headache</b>     |                                                                   |                                                                  |                                                                 |                                                                |                                                                   |                                                                   |
| None                | 9 (75.0)                                                          | 9 (100)                                                          | 11 (91.7)                                                       | 11 (100)                                                       | 7 (58.3)                                                          | 11 (91.7)                                                         |
| Mild                | 3 (25.0)                                                          | 0 (0)                                                            | 1 (8.3)                                                         | 0 (0)                                                          | 3 (25.0)                                                          | 1 (8.3)                                                           |
| Moderate            | 0 (0)                                                             | 0 (0)                                                            | 0 (0)                                                           | 0 (0)                                                          | 2 (16.7)                                                          | 0 (0)                                                             |
| Severe              | 0 (0)                                                             | 0 (0)                                                            | 0 (0)                                                           | 0 (0)                                                          | 0 (0)                                                             | 0 (0)                                                             |
| <b>Chills</b>       |                                                                   |                                                                  |                                                                 |                                                                |                                                                   |                                                                   |
| None                | 11 (91.7)                                                         | 8 (88.9)                                                         | 12 (100)                                                        | 11 (100)                                                       | 10 (83.3)                                                         | 12 (100)                                                          |
| Mild                | 0 (0)                                                             | 1 (11.1)                                                         | 0 (0)                                                           | 0 (0)                                                          | 1 (8.3)                                                           | 0 (0)                                                             |
| Moderate            | 1 (8.3)                                                           | 0 (0)                                                            | 0 (0)                                                           | 0 (0)                                                          | 1 (8.3)                                                           | 0 (0)                                                             |
| Severe              | 0 (0)                                                             | 0 (0)                                                            | 0 (0)                                                           | 0 (0)                                                          | 0 (0)                                                             | 0 (0)                                                             |
| <b>Nausea</b>       |                                                                   |                                                                  |                                                                 |                                                                |                                                                   |                                                                   |
| None                | 8 (66.7)                                                          | 9 (100)                                                          | 11 (91.7)                                                       | 10 (90.9)                                                      | 8 (66.7)                                                          | 10 (83.3)                                                         |
| Mild                | 3 (25.0)                                                          | 0 (0)                                                            | 1 (8.3)                                                         | 1 (9.1)                                                        | 4 (33.3)                                                          | 1 (8.3)                                                           |
| Moderate            | 1 (8.3)                                                           | 0 (0)                                                            | 0 (0)                                                           | 0 (0)                                                          | 0 (0)                                                             | 1 (8.3)                                                           |
| Severe              | 0 (0)                                                             | 0 (0)                                                            | 0 (0)                                                           | 0 (0)                                                          | 0 (0)                                                             | 0 (0)                                                             |
| <b>Temperature</b>  |                                                                   |                                                                  |                                                                 |                                                                |                                                                   |                                                                   |
| None                | 12 (100)                                                          | 9 (100)                                                          | 12 (100)                                                        | 11 (100)                                                       | 11 (91.7)                                                         | 12 (100)                                                          |
| Mild                | 0 (0)                                                             | 0 (0)                                                            | 0 (0)                                                           | 0 (0)                                                          | 1 (8.3)                                                           | 0 (0)                                                             |
| Moderate            | 0 (0)                                                             | 0 (0)                                                            | 0 (0)                                                           | 0 (0)                                                          | 0 (0)                                                             | 0 (0)                                                             |
| Severe              | 0 (0)                                                             | 0 (0)                                                            | 0 (0)                                                           | 0 (0)                                                          | 0 (0)                                                             | 0 (0)                                                             |
| <b>Joint pain</b>   |                                                                   |                                                                  |                                                                 |                                                                |                                                                   |                                                                   |
| None                | 10 (83.3)                                                         | 8 (88.9)                                                         | 10 (83)                                                         | 11 (100)                                                       | 12 (100)                                                          | 11 (91.7)                                                         |
| Mild                | 0 (0)                                                             | 1 (11.1)                                                         | 2 (16.7)                                                        | 0 (0)                                                          | 0 (0)                                                             | 1 (8.3)                                                           |
| Moderate            | 2 (16.7)                                                          | 0 (0)                                                            | 0 (0)                                                           | 0 (0)                                                          | 0 (0)                                                             | 0 (0)                                                             |
| Severe              | 0 (0)                                                             | 0 (0)                                                            | 0 (0)                                                           | 0 (0)                                                          | 0 (0)                                                             | 0 (0)                                                             |
| <b>Any systemic</b> |                                                                   |                                                                  |                                                                 |                                                                |                                                                   |                                                                   |
| None                | 6 (50)                                                            | 6 (66.7)                                                         | 9 (75.0)                                                        | 10 (90.9)                                                      | 4 (33.3)                                                          | 7 (58.3)                                                          |
| Mild                | 4 (33.3)                                                          | 2 (22.2)                                                         | 3 (25.0)                                                        | 1 (9.1)                                                        | 6 (50)                                                            | 4 (33.3)                                                          |
| Moderate            | 2 (16.7)                                                          | 1 (11.1)                                                         | 0 (0)                                                           | 0 (0)                                                          | 2 (16.7)                                                          | 1 (8.3)                                                           |
| Severe              | 0 (0)                                                             | 0 (0)                                                            | 0 (0)                                                           | 0 (0)                                                          | 0 (0)                                                             | 0 (0)                                                             |

\*See Supplementary Table 4.

| #  | Detector | Fluorophore      | Panel 1                                        | Panel 2                                        | Panel 3                                        | Panel 4   | Panel 5                                            |
|----|----------|------------------|------------------------------------------------|------------------------------------------------|------------------------------------------------|-----------|----------------------------------------------------|
|    |          |                  | Human ICS (PfSPZ stim)<br>Human liver (unstim) | Human ICS (PfRBC stim)<br>Human liver (unstim) | Human ICS (PfRBC stim)<br>Human liver (unstim) |           | NHP ICS (PfSPZ / PfRBC stim)<br>NHP liver (unstim) |
| 1  | B515     | FITC             | Ki-67                                          |                                                | TCR V $\delta$ 1                               |           |                                                    |
| 2  | B710     | Cy5.5PerCP       | TCR Va7.2                                      |                                                |                                                | TCR Va7.2 |                                                    |
| 3  | V440     | BV421            |                                                |                                                |                                                |           | IFN- $\gamma$                                      |
| 4  | V510     | Aqua/BV510*      | Viability/CD14*                                |                                                |                                                |           |                                                    |
| 5  | V570     | BV570            |                                                |                                                |                                                |           | CD8                                                |
| 6  | V605     | BV605            | IL-2                                           |                                                |                                                |           | IL-2                                               |
| 7  | V650     | BV650            | TNF- $\alpha$                                  |                                                |                                                |           | TNF- $\alpha$                                      |
| 8  | V710     | BV711            | CD56                                           |                                                |                                                | CD56      |                                                    |
| 9  | V750     | BV750            |                                                |                                                |                                                |           |                                                    |
| 10 | V800     | BV785            | CD4                                            |                                                |                                                |           |                                                    |
| 11 | R660     | APC              | IFN $\gamma$                                   |                                                | TCR Vy9                                        |           | NKG2a                                              |
| 12 | R710     | Ax680            | CCR7                                           |                                                |                                                |           |                                                    |
| 13 | R780     | Cy7APC           | CD3                                            |                                                |                                                |           |                                                    |
| 14 | G560     | PE               | CXCR6                                          | Perforin                                       |                                                |           | TCR Va7.2                                          |
| 15 | G610     | CF594PE          | TCR $\gamma\delta$                             |                                                |                                                |           |                                                    |
| 16 | G660     | Cy5PE            | CD161                                          | CD38                                           | TCR V $\delta$ 2                               | CD161     |                                                    |
| 17 | G710     | Cy5.5PE/Ax700PE# | CD45RA                                         |                                                |                                                | CD20#     | CD45RA                                             |
| 18 | G780     | Cy7PE            | CD8                                            |                                                |                                                |           | CD161                                              |

| Manufacturer     | Specificity        | Fluorophore | Clone     | Catalog    |
|------------------|--------------------|-------------|-----------|------------|
| BD               | CD3                | Cy7APC      | SP34.2    | 557757     |
| BioLegend        | CD4                | BV785       | OKT4      | 317441     |
| BioLegend        | CD8                | Cy7PE       | RPA-T8    | 301012     |
| BioLegend        | CD14               | BV510       | M5E2      | 301842     |
| BD               | CD38               | Cy5PE       | HIT2      | 555461     |
| Invitrogen       | CD45RA             | Cy5.5PE     | MEM-56    | MHCD45RA18 |
| BD               | CD56               | BV711       | NCAM16.2  | 563169     |
| BioLegend        | TCR Va7.2          | Cy5.5PerCP  | 3C10      | 351710     |
| BD               | CD161              | Cy5PE       | DX12      | 551138     |
| BD               | TCR $\gamma\delta$ | CF594PE     | B1        | 562511     |
| ThermoScientific | TCR V $\delta$ 1   | FITC        | TS8.2     | TCR2730    |
| VRC              | TCR V $\delta$ 2   | Cy5PE       | B6        | --         |
| BioLegend        | TCR Vy9            | APC         | B3        | 331310     |
| BioLegend        | CXCR6              | PE          | K041E5    | 356004     |
| VRC              | CCR7               | Ax680       | 150503    | --         |
| BioLegend        | IFN- $\gamma$      | APC         | 4S.B3     | 502512     |
| BioLegend        | IL-2               | BV605       | MQ1-17H12 | 500331     |
| BioLegend        | TNF- $\alpha$      | BV650       | MAb11     | 502937     |
| BioLegend        | Perforin           | PE          | B-D48     | 353303     |
| BD               | Ki-67              | FITC        | B56       | 556026     |
| BioLegend        | CD8                | BV570       | RPA-T8    | 301038     |
| BioLegend        | CD161              | Cy7PE       | HP-3G10   | 339918     |
| Beckman Coulter  | NKG2a              | APC         | Z199      | A60797     |
| BioLegend        | TCR Va7.2          | PE          | 3C10      | 351706     |
| BioLegend        | IFN- $\gamma$      | BV421       | 4S.B3     | 502532     |
| VRC              | CD20               | Ax700PE     | 2H7       | --         |

**Supplementary Table 6** Flow cytometry staining panels.

**Supplementary Table 6** Flow cytometry staining panels.

Three flow cytometry staining panels were developed to assess the magnitude, quality, and phenotype of Pf-specific lymphocytes. All three panels allow for the identification of  $\gamma\delta$ , CD4, and CD8 T cell lineages, each of which have been shown to contribute to immunity against liver stage malaria in animal models with SPZ vaccines. Within each lineage, naive, central memory ( $T_{CM}$ ), effector memory ( $T_{EM}$ ), and terminal effector memory (TE) subsets are identified.

*Panels 1 and 2* allow for identification of Pf-specific cells by intracellular cytokine staining of IFN- $\gamma$ , IL-2, or TNF- $\alpha$  following stimulation with PfSPZ or PfRBC, respectively. Stimulation with PfRBC is used to increase the sensitivity of detected Pf-specific CD8 T cell responses.

*Panel 1* includes the following phenotypic markers:

CXCR6, a chemokine receptor expressed by tissue-resident T cells trafficking in the liver

Ki-67, a transcription factor expressed in cells that have recently undergone cell division

*Panel 1* stains for NK and MAIT cell subsets.

*Panel 2* includes the following phenotypic markers:

CD38, a marker of T cell activation

Perforin, an effector molecule

*Panel 3* allows for the identification of the  $\gamma\delta$  T cell sub-families defined by the expression of V $\gamma$ 9, V $\delta$ 1, and V $\delta$ 2 TCRs.

PBMCs ( $1.5 \times 10^6$  cells per well) were stained with the 3 different panels following stimulation with:

*Panel 1*

1. PfSPZ Vaccine ( $1.5 \times 10^5$  PfSPZ)

2. Vaccine diluent (1% HSA)

*Panel 2 and 3*

3. Pf-infected erythrocytes ( $2.0 \times 10^5$  PfRBC)

4. Uninfected erythrocytes ( $2.0 \times 10^5$  uRBC)

| Group | Subject ID | Net OD1.0 anti-PfCSP antibodies by ELISA | AFU $2 \times 10^5$ anti-PfSPZ antibodies by aIFA |
|-------|------------|------------------------------------------|---------------------------------------------------|
| 1 ●   | 102        | 8711                                     | 4950                                              |
|       | 103        | 5227                                     | 5235                                              |
|       | 104        | 9066                                     | 10799                                             |
|       | 105        | 1040                                     | 396                                               |
|       | 106        | 36163                                    | 25800                                             |
|       | 107        | no sample                                | no sample                                         |
|       | 108        | 8601                                     | 2984                                              |
|       | 109        | 3893                                     | 3519                                              |
|       | 110        | 4902                                     | 2085                                              |
|       | 111        | 22050                                    | 12907                                             |
|       | 112        | 3463                                     | 2184                                              |
| 2 ■   | 201        | 1368                                     | 301                                               |
|       | 202        | 1371                                     | 294                                               |
|       | 203        | 2189                                     | 820                                               |
|       | 204        | 979                                      | 271                                               |
|       | 205        | 1155                                     | 235                                               |
|       | 206        | 4257                                     | 1030                                              |
|       | 207        | 3566                                     | 818                                               |
|       | 208        | 763                                      | 148                                               |
|       | 209        | 279                                      | 100                                               |
| 3 ▲   | 301        | 3476                                     | 1784                                              |
|       | 302        | 10986                                    | 4922                                              |
|       | 303        | 14309                                    | 4240                                              |
|       | 304        | 25735                                    | 17659                                             |
|       | 305        | 4550                                     | 380                                               |
|       | 306        | 8046                                     | 2567                                              |
|       | 307*       | 2458                                     | 735                                               |
|       | 308        | 3603                                     | 2489                                              |
|       | 309        | 10385                                    | 10537                                             |
|       | 310        | 18871                                    | 18141                                             |
|       | 311        | 3379                                     | 973                                               |
|       | 312        | 11731                                    | 6309                                              |
| 4 ◆   | 401        | 11249                                    | 4910                                              |
|       | 402        | 2829                                     | 1065                                              |
|       | 403        | 5114                                     | 2376                                              |
|       | 405        | 15083                                    | 3746                                              |
|       | 406        | 480                                      | 621                                               |
|       | 407        | 22754                                    | 32215                                             |
|       | 408        | 35589                                    | 15840                                             |
|       | 411        | 11411                                    | 17571                                             |
|       | 412        | 15468                                    | 13769                                             |
| 5 ▼   | 501        | 14369                                    | 9980                                              |
|       | 502        | 792                                      | 597                                               |
|       | 504        | 10171                                    | 539                                               |
|       | 505        | 1196                                     | 7534                                              |
|       | 506        | 1004                                     | 435                                               |
|       | 507        | 2924                                     | 1355                                              |
|       | 508        | 11361                                    | 8592                                              |
|       | 509        | 17921                                    | 7863                                              |
|       | 510        | 7090                                     | 6389                                              |
|       | 511        | 12102                                    | 1076                                              |
|       | 512        | 9094                                     | 23101                                             |

**Supplementary Table 7** Individual antibody responses two weeks after final vaccination.

\*Received 5 doses of  $1.35 \times 10^5$  PfSPZ
